# Molecular Epidemiology and Genetic Evolution of the Whole Genome of G3P[8] Human Rotavirus in Wuhan, China, from 2000 through 2013

Yuan-Hong Wang<sup>1\*</sup>, Bei-Bei Pang<sup>1</sup>, Souvik Ghosh<sup>2</sup>, Xuan Zhou<sup>1</sup>, Tsuzumi Shintani<sup>2</sup>, Noriko Urushibara<sup>2</sup>, Yu-Wei Song<sup>3</sup>, Ming-Yang He<sup>3</sup>, Man-Qing Liu<sup>1</sup>, Wei-Feng Tang<sup>1</sup>, Jin-Song Peng<sup>1</sup>, Quan Hu<sup>1</sup>, Dun-Jin Zhou<sup>1</sup>, Nobumichi Kobayashi<sup>2\*</sup>

**1** Virology section, Wuhan Centers for Disease Prevention and Control, Wuhan, Hubei Province, P.R. China, **2** Department of Hygiene, Sapporo Medical University School of Medicine, Sapporo, Japan, **3** College of Life Sciences, Central China Normal University, Wuhan, Hubei Province, P.R. China

## Abstract

**Background:** Rotaviruses are a major etiologic agent of gastroenteritis in infants and young children worldwide. Since the latter of the 1990s, G3 human rotaviruses referred to as “new variant G3” have emerged and spread in China, being a dominant genotype until 2010, although their genomic evolution has not yet been well investigated.

**Methods:** The complete genomes of 33 G3P[8] human rotavirus strains detected in Wuhan, China, from 2000 through 2013 were analyzed. Phylogenetic trees of concatenated sequences of all the RNA segments and individual genes were constructed together with published rotavirus sequences.

**Results:** Genotypes of 11 gene segments of all the 33 strains were assigned to G3-P[8]-I1-R1-C1-M1-A1-N1-T1-E1-H1, belonging to Wa genogroup. Phylogenetic analysis of the concatenated full genome sequences indicated that all the modern G3P[8] strains were assigned to Cluster 2 containing only one clade of G3P[8] strains in the US detected in the 1970s, which was distinct from Cluster 1 comprising most of old G3P[8] strains. While main lineages of all the 11 gene segments persisted during the study period, different lineages appeared occasionally in RNA segments encoding VP1, VP4, VP6, and NSP1-NSP5, exhibiting various allele constellations. In contrast, only a single lineage was detected for VP7, VP2, and VP3 genes. Remarkable lineage shift was observed for NSP1 gene; lineage A1-2 emerged in 2007 and became dominant in 2008–2009 epidemic season, while lineage A1-1 persisted throughout the study period.

**Conclusion:** Chinese G3P[8] rotavirus strains have evolved since 2000 by intra-genogroup reassortment with co-circulating strains, accumulating more reassorted genes over the years. This is the first large-scale whole genome-based study to assess the long-term evolution of common human rotaviruses (G3P[8]) in an Asian country.

**Citation:** Wang Y-H, Pang B-B, Ghosh S, Zhou X, Shintani T, et al. (2014) Molecular Epidemiology and Genetic Evolution of the Whole Genome of G3P[8] Human Rotavirus in Wuhan, China, from 2000 through 2013. PLoS ONE 9(3): e88850. doi:10.1371/journal.pone.0088850

**Editor:** Dong-Yan Jin, University of Hong Kong, Hong Kong

**Received:** October 29, 2013; **Accepted:** January 11, 2014; **Published:** March 27, 2014

**Copyright:** © 2014 Wang et al. This is an open-access article distributed under the terms of the Creative Commons Attribution License, which permits unrestricted use, distribution, and reproduction in any medium, provided the original author and source are credited.

**Funding:** The work was funded by the National Natural Science Foundation of China (Grant no. 81071352), and the fund for experts of Wuhan municipality to Yuan-Hong Wang, and the Grant-in-Aid for Scientific Research (Grant no. 25305022) from the Japan Society for the Promotion of Science, and the Grant-in-Aid for Research on Emerging and Re-emerging Infectious Diseases (grant H25-shinkou-ippan-005) by the Ministry of Health, Labour and Welfare, Japan to NK. The funders had no role in study design, data collection and analysis, decision to publish, or preparation of the manuscript.

**Competing Interests:** The authors have declared that no competing interests exist.

\* E-mail: wyhhyc@163.com (YHW); nkobayas@sapmed.ac.jp (NK)

## Introduction

Group A rotavirus (RVA) is the leading etiological agent responsible for severe diarrhea in infants and young children worldwide, causing approximately 453,000 deaths each year [1]. Rotavirus, a genus of the family *Reoviridae*, has 11 segments of double-stranded RNA as its genome which are enclosed in a triple-layered capsid. These segments encode six structural proteins (VP1-VP4, VP6 and VP7) and six nonstructural proteins (NSP1-NSP6) [2]. Two outer capsid proteins, VP7 and VP4, contain neutralizing epitopes which define serotypes of rotavirus. Based on diversity of the VP7 and VP4 genes, G and P genotypes have been defined for RVA, respectively, and at least 27 G types and 37 P types have been discriminated [3,4]. In human rotaviruses, G1,

G2, G3, G4, G9, and G12 combined with P[4], P[6], and P[8] are frequently detected throughout the world, with G1P[8] being the most prevalent in humans [5,6]. In terms of the whole genome-based genotyping system, most of human rotaviruses are classified into at least two major genogroups, i.e., Wa genogroup and DS-1 genogroup, with genotype constellations G1(or 3, 4)-P[8]-I1-R1-C1-M1-A1-N1-T1-E1-H1 and G2-P[4]-I2-R2-C2-M2-A2-N2-T2-E2-H2, respectively.

G3P[8], one of the common types in human rotaviruses, accounted for about 3.3–5.4% of all the strains from 1981 through 2004 globally, and had been described as the fourth dominant type following G1P[8], G2P[4], and G4P[8] [5,6]. However, the proportion of G3P[8] among human RVA increased to 18.9% in

Asia, in 2000–2009 [7], and G3P[8] became predominant or dominant genotype in eastern and south-east Asia from 2000 through 2011 [7–13]. These G3 strains were referred to as “the new variant G3” rotaviruses, represented by strain RVA/Human-wt/JPN/5091/2003-2004/G3P[X]. VP7 genes of the new variant G3 strains shared nucleotide sequence identities of  $\leq 98\%$  with those of conventional G3 rotaviruses. This was attributed to accumulation of mutations in the VP7 genes of these new variant RVAs, some of which resulted in amino acid changes [14,15]. In China, G3P[8] has been reported as a dominant strain since the late of the 1990's in some provinces [8,9], and became the most common genotype all over the country from 2000 through 2010 [8–13]. In Wuhan, a city located in central China, G3P[8] has been a predominant genotype from December 2000 through 2009–2010 epidemic seasons, then decreased to 10.2% during the 2011–2012 epidemic year [16–18]. It is suggested that the new variant G3 rotavirus emerged in the mainland of China in 1997 or earlier, thereafter spread in China and the areas around it in the following decade (Table S1). The G3P[8] rotaviruses with VP7 gene genetically close to the new variant G3 strain were detected also in Ireland, Spain, Canada, South Africa, America, Argentina, Germany, Italy, Belgium, Nicaragua from 2004 through 2010 [16–46]. These findings indicated that the new variant G3P[8] rotavirus might have emerged in Asia and rapidly spread worldwide.

To obtain conclusive data on the overall genetic makeup and evolutionary patterns of common RVAs, whole genomic analysis of rotavirus strains detected over a period of many years is essential [47]. Because the G3 RVA has been prevailing in China for more than 10 years, whole genome-based phylogenetic analysis may reveal genetic evolution of this common RVA and genetic mechanisms of their successful spread. However, for the new variant G3P[8] RVA strains, only the VP7 genes and their deduced amino acid sequences have been exclusively analyzed so far [14,15,21,26,30]. In China, whole genomic analysis of human RVA was performed for only three G1P[8] strains [48], a G2P[4] strain [49], two G3P[9] strains [50], and five G4P[6] strains [51,52]. On the other hand, whole genome of G3P[8] RVA was analyzed only for those detected in the US in 1974–1980, 1991 and 2006–2008 [19,37]. Therefore, the present study in China is the first long-term large scale study on G3P[8] rotaviruses outside the US.

Conventionally, rotavirus genome has been detected and studied by migration pattern of the 11 segments in polyacrylamide gel electrophoresis (PAGE), i.e., RNA pattern or electropherotype. The polymorphism of the electropherotypes reflects the diversity of individual gene segments, and can be caused by mutations, rearrangement and reassortment of gene segments [2]. In previous reports, recent G3P[8] human RVA strains in Wuhan, China and Haiphong, Vietnam were discriminated into several electropherotypes [17,33], suggesting the presence of heterogeneous viruses among the new variant G3P[8] rotaviruses.

To describe genetic diversity and evolution of the whole genome of G3P[8] human rotaviruses and to explore the possible origin of these RVA strains, we determined the whole genome sequences of 33 G3P[8] rotavirus strains with identical or different electropherotypes detected in Wuhan from 2000 through 2013. In this study, phylogenetic analysis was performed together with G3P[8] strains and the other common Wa genogroup strains with G1P[8], G9[8], G4P[8] genotypes worldwide, to know relatedness to these common RVA strains. Because of predominance of the G3P[8] rotavirus in China in the last decade, large-scale whole genome-based study of these rotavirus strains provides significant

information on evolution of RVAs, which is relevant to vaccine practice.

## Materials and Methods

### Specimens and detection of rotavirus

Stool specimens were collected in Wuhan from December 2000 through May 2013 as described in previous studies [16–18]. The presence of rotaviruses in stool specimens was determined by detection of 11 RNA segments of rotavirus by PAGE as described previously [53]. Viral dsRNA was extracted from 400  $\mu$ l of 10% stool suspension with sodium dodecyl sulfate (SDS) and phenol, and precipitated with ethanol. RNA segments of rotavirus were separated by PAGE and stained with silver nitrate and electropherotypes were discriminated as described previously [53].

### Genotyping of rotavirus

VP7 and VP4 genotyping of the RVA strains were performed by multiplex semi-nested PCR assays using several sets of G- and P- genotype primers as described previously [54–57]. The validity of the PCR-based genotyping data was confirmed by sequencing the VP7 and VP4 genes of several strains representing the different genotypes, such as G1, G2, G3, G4, G9, P[4], P[6], P[8] and P[9].

### Nucleotide sequencing and phylogenetic analysis

Nearly full-length nucleotide sequences (excluding the 5'-end and 3'-end primer sequences) of gene segments encoding VP7-VP4-VP6-VP1-VP2-VP3-NSP1-NSP2-NSP3-NSP4-NSP5/6 were determined directly with RT-PCR products. Viral RNA was extracted from stool samples or the tissue culture fluid using the QIAamp Viral RNA Mini Kit (Qiagen GmbH, Germany). Primers used for the amplification of different RVA genes are shown in Table S2. RT-PCRs were performed using the QIAGEN One Step RT-PCR Kit (Qiagen GmbH, Germany). Nucleotide sequences were determined using the BigDye Terminator v3.1 Cycle Sequencing kit (Applied Biosystems, CA, USA) on an automated DNA sequencer (ABI PRISM 3730). Phylogenetic trees of concatenated all the segments (concatenated ORF nucleotide sequences for each strain) and the individual segments were constructed by Maximum Likelihood method using MEGA (v5.01) software. The trees were statistically supported by bootstrapping with 1000 replicates, and phylogenetic distances were measured by Hasegawa-Kishino-Yano model. Phylogenetic analysis was also validated by other models, i.e., Kimura 2-parameter model, Jukes-Cantor model, and Tamura-Nei model. Multiple alignments of the determined sequences were performed using CLUSTAL W (<http://clustalw.ddbj.nig.ac.jp/>) and MAFFT (<http://mafft.cbrc.jp/alignment/software/>) program with default parameters.

### Accession numbers of nucleotide sequences

The nucleotide sequences of the 11 gene segments of the 33 G3P[8] RVA strains were deposited in the GenBank database under accession numbers KF371703-KF371942 and KF371662-KF371702, except for the VP7 genes of Y111, L210, R709, L478, E566 which were sequenced previously (Table 1). In addition to these G3P[8] strains, we also obtained the nearly full-length nucleotide sequences of the NSP1, NSP2, NSP3, and NSP4 genes of an archival G3 strain YO (RVA/Human-tc/JPN/YO/1976/G3P[8]) (GenBank accession numbers JX629046-JX629049, respectively).

**Table 1.** Profiles of Chinese G3P[8] RVA strains from 2000 to 2013.

| No. | Strain                             | Date of collection<br>(year-month) | sex | age (year, y/month, m)<br>(child/adult) | PAGE profile of<br>RNA segment 5 | GenBank accession<br>numbers             | VP7      |
|-----|------------------------------------|------------------------------------|-----|-----------------------------------------|----------------------------------|------------------------------------------|----------|
| 1   | RVA/Human-wt/CHN/A16/2000/G3P[8]   | 2000-12                            | M   | 1.5 y                                   | E-A1-1                           | NSP1-NSP5/6,VP1-VP6<br>KF371725–KF371734 | KF371735 |
| 2   | RVA/Human-wt/CHN/31/2002/G3P[8]    | 2002-9                             | F   | child                                   | E-A1-1                           | KF371703–KF371712                        | KF371713 |
| 3   | RVA/Human-wt/CHN/723/2003/G3P[8]   | 2003-1                             | M   | 7 m                                     | E-A1-1                           | KF371714–KF371723                        | KF371724 |
| 4   | RVA/Human-wt/CHN/R107/2003/G3P[8]  | 2003-11                            | F   | adult                                   | E-A1-1                           | KF371954–KF371963                        | KF371964 |
| 5   | RVA/Human-wt/CHN/R303/2004/G3P[8]  | 2004-1                             | M   | 4 y                                     | E-A1-1                           | KF371965–KF371974                        | KF371975 |
| 6   | RVA/Human-wt/CHN/Y106/2004/G3P[8]  | 2004-10                            | F   | 20 m                                    | E-A1-1                           | KF371987–KF371996                        | KF371997 |
| 7   | RVA/Human-tc/CHN/Y111/2004/G3P[8]  | 2004-10                            | F   | 9 m                                     | E-A1-1                           | KF371693–KF371702                        | DQ873678 |
| 8   | RVA/Human-tc/CHN/L148/2004/G3P[8]  | 2004-12                            | M   | 23 y                                    | E-A1-1                           | KF371672–KF371681                        | KF371682 |
| 9   | RVA/Human-wt/CHN/L210/2005/G3P[8]  | 2005-2                             | M   | 43 y                                    | E-A1-1                           | KF371890–KF371899                        | DQ873671 |
| 10  | RVA/Human-tc/CHN/R709/2005/G3P[8]  | 2005-8                             | F   | 3 m                                     | E-A1-1                           | KF371683–KF371692                        | DQ873677 |
| 11  | RVA/Human-wt/CHN/L478/2006/G3P[8]  | 2006-1                             | M   | 52 y                                    | E-A1-1                           | KF371900–KF371909                        | EU708580 |
| 12  | RVA/Human-wt/CHN/R1267/2006/G3P[8] | 2006-9                             | M   | 3 y                                     | E-A1-1                           | KF371921–KF371930                        | KF371931 |
| 13  | RVA/Human-wt/CHN/E093/2007/G3P[8]  | 2007-3                             | F   | 10 m                                    | E-A1-2                           | KF371736–KF371745                        | KF371746 |
| 14  | RVA/Human-wt/CHN/E329/2007/G3P[8]  | 2007-6                             | F   | 1 y                                     | E-A1-2                           | KF371747–KF371756                        | KF371757 |
| 15  | RVA/Human-tc/CHN/E566/2007/G3P[8]  | 2007-9                             | M   | 1 y                                     | E-A1-1                           | KF371662–KF371671                        | EU708585 |
| 16  | RVA/Human-wt/CHN/E707/2007/G3P[8]  | 2007-10                            | F   | 1 y                                     | E-A1-2                           | KF371758–KF371767                        | KF371768 |
| 17  | RVA/Human-wt/CHN/E956/2008/G3P[8]  | 2008-2                             | F   | 8 m                                     | E-A1-1                           | KF371769–KF371778                        | KF371779 |
| 18  | RVA/Human-wt/CHN/E1367/2008/G3P[8] | 2008-10                            | M   | 6 m                                     | E-A1-2                           | KF371780–KF371789                        | KF371790 |
| 19  | RVA/Human-wt/CHN/L1066/2009/G3P[8] | 2009-2                             | F   | 64 y                                    | E-A1-2                           | KF371910–KF371919                        | KF371920 |
| 20  | RVA/Human-wt/CHN/E1857/2009/G3P[8] | 2009-10                            | M   | 7 m                                     | E-A1-2                           | KF371791–KF371800                        | KF371801 |
| 21  | RVA/Human-wt/CHN/E1861/2009/G3P[8] | 2009-10                            | F   | 9 m                                     | E-A1-1                           | KF371802–KF371811                        | KF371812 |
| 22  | RVA/Human-wt/CHN/E2000/2010/G3P[8] | 2010-2                             | M   | 1 y                                     | E-A1-1                           | KF371813–KF371822                        | KF371823 |
| 23  | RVA/Human-wt/CHN/E2421/2010/G3P[8] | 2010-12                            | F   | 1 y6 m                                  | E-A1-1                           | KF371824–KF371833                        | KF371834 |
| 24  | RVA/Human-wt/CHN/E2422/2010/G3P[8] | 2010-12                            | M   | 6 m                                     | E-A1-2                           | KF371835–KF371844                        | KF371845 |
| 25  | RVA/Human-wt/CHN/E2432/2010/G3P[8] | 2010-12                            | M   | 6 m                                     | E-A1-2                           | KF371846–KF371855                        | KF371856 |
| 26  | RVA/Human-wt/CHN/E2461/2011/G3P[8] | 2011-1                             | M   | 1 y3 m                                  | E-A1-1                           | KF371857–KF371866                        | KF371867 |
| 27  | RVA/Human-wt/CHN/R1604/2011/G3P[8] | 2011-1                             | F   | 8 m                                     | E-A1-1                           | KF371976–KF371985                        | KF371986 |
| 28  | RVA/Human-wt/CHN/Z1557/2011/G3P[8] | 2011-10                            | F   | 62 y                                    | E-A1-2                           | KF371998–KF372007                        | KF372008 |
| 29  | RVA/Human-wt/CHN/E2835/2011/G3P[8] | 2011-11                            | M   | 5 m                                     | E-A1-2                           | KF371868–KF371877                        | KF371878 |
| 30  | RVA/Human-wt/CHN/L1450/2012/G3P[8] | 2012-1                             | F   | 51 y                                    | E-A1-1                           | KF371943–KF371952                        | KF371953 |
| 31  | RVA/Human-wt/CHN/Z1602/2012/G3P[8] | 2012-1                             | M   | 57 y                                    | E-A1-2                           | KF372009–KF372018                        | KF372019 |
| 32  | RVA/Human-wt/CHN/E3239/2012/G3P[8] | 2012-9                             | M   | 1 y                                     | E-A1-1                           | KF371879–KF371888                        | KF371889 |
| 33  | RVA/Human-wt/CHN/L1621/2013/G3P[8] | 2013-3                             | F   | 57 y                                    | E-A1-1                           | KF371932–KF371941                        | KF371942 |

doi:10.1371/journal.pone.0088850.t001

## Results

### Prevalence and fluctuation of G types during the study period

From December 2000 through May 2013, the VP7- and VP4-genes of a total of 1644 RVA strains were genotyped. G3 was identified in 895 strains, among which 889 strains were typed as G3P[8], while remaining strains were found to have G3P[4], G3P[6] or G3P[9] genotypes. Genotypes of 89 G3, 63 G9, 48 G1, 10 G2, 4 G4, 105 P[8], 15 P[4], 5 P[6], and 2 P[9] strains were confirmed by sequencing of the VP7 and VP4 genes. G3 RVAs were predominant from 2000 through 2010. The proportion of G3 RVAs increased dramatically from 66.7% in 2000–2001 to 96.4% in 2001–2002, and was maintained over 84% until 2004–2005. However, it decreased to 51.3% in 2005–2006, then after slight increase in 2008–2009 (77.7%), decreased again gradually to 10.2% in 2011–2012 epidemic season (Fig. 1).

### Electropherotypes of Rotavirus strains and two distinct migration patterns of NSP1 gene

A total of 33 G3P[8] RVA strains were selected for the whole genomic sequencing analysis (Table 1). At least 2 strains in each epidemic year at the beginning and the end of the epidemic season (from September to the following February) were chosen for this analysis, except for 2001. During this study period, at least 14 electropherotypes of G3P[8] HRV were discriminated (data not shown). All the 889 G3P[8] strains were classified into two types on the basis of distinct migration patterns of RNA segment 5 (NSP1 gene) which are designated E-A1-1 and E-A1-2 with slower and faster migration, respectively (Fig. S1). The E-A1-1-NSP1 gene segment had been detected throughout the study period since 2000, while E-A1-2 segment was detected in 2007 and thereafter (Table 2). Strains with segment E-A1-2 as well as those with E-A1-1 were selected for whole genomic analysis after 2007.

### Genotype constellation and phylogenetic analysis of the G3P[8] RVA strains

By nucleotide sequence identities and phylogenetic analysis of the nearly full-length sequences of all the gene segments, the VP7-VP4-VP6-VP1-VP2-VP3-NSP1-NSP2-NSP3-NSP4-NSP5/6 genes of all the 33 strains were assigned to G3-P[8]-I1-R1-C1-M1-A1-N1-T1-E1-H1 genotypes, respectively, indicating that all

the G3P[8] RVA strains belonged to Wa genogroup. Among the 33 strains, the VP7, VP4, VP1-VP3, NSP4 and NSP5 genes were closely related with nucleotide sequence identities of 95–100%, while genetic diversity was noted for VP6 and NSP1-NSP3 genes (lowest identities of 83–89%). Phylogenetic trees were constructed for concatenated all the segments and individual RNA segments, and genetic relatedness was analyzed for the 33 G3P[8] strains together with other 88 G3P[8] strains and some strains with other genotypes belonging to Wa genogroup for which the whole genome sequences are available in GenBank database (Fig. 2–13). These 88 G3P[8] strains were collected in the US, Thailand, Nicaragua and Japan during various period(s) from 1974 through 2011. (Fig. 14) [19,37].

In order to understand whole genomic relatedness of the Chinese G3P[8] strains and other G3 RVA strains for which the whole genome data are available, total 121 G3P[8] strains in the world were analyzed by the phylogenetic tree constructed using the concatenated ORF nucleotide sequences for each strain (Fig. 2 and Fig. 14). In the concatenated tree, the G3P[8] RVA strains were classified into 2 clusters. Cluster 1 contained archival G3P[8] strains in the US before 1991. All modern G3P[8] RVA in the world, including 33 Chinese G3P[8] strains detected from 2000 to 2013, were genetically grouped into cluster 2. In the cluster 2, 72 strains could be further classified as 9 clades (clade 5–13) with several exceptions. Chinese G3 RVA strains were classified into 7 clades (6–9, 11–13), among which recent Chinese G3 strains (2010–2013) were assigned into clades 7, 12, and 13, which clustered with a few G3P[8] strains in Thailand, the US and Nicaragua. Three old US strains in the 1970's clustered in clade 5 which is phylogenetically isolated from all other clades including Chinese G3 strains. Most of American modern G3P[8] strains were located in clade 10 that is close to the Chinese strains collected in 2002–2005. Some recent G3 strains in the US (2006–2008) clustered with Chinese G3 strains in clades 6, 7 and 13. Clade 13, including strains in China, the US and Nicaragua in 2007–2012, segregated consistently with the lineage A1-2 of NSP1 gene. A clade could persist for several years in different countries such as clades 6, 7 and 13, and different clades co-circulated in a same country.

G3-VP7 genes of the 33 strains were highly conserved (identities of 98–100%) and clustered into a single lineage (Lineage 3, sublineage 3a) with contemporary G3 strains in the world (Fig. 3). Most of other sublineages within lineage 3 (3b, 3c, and 3d)

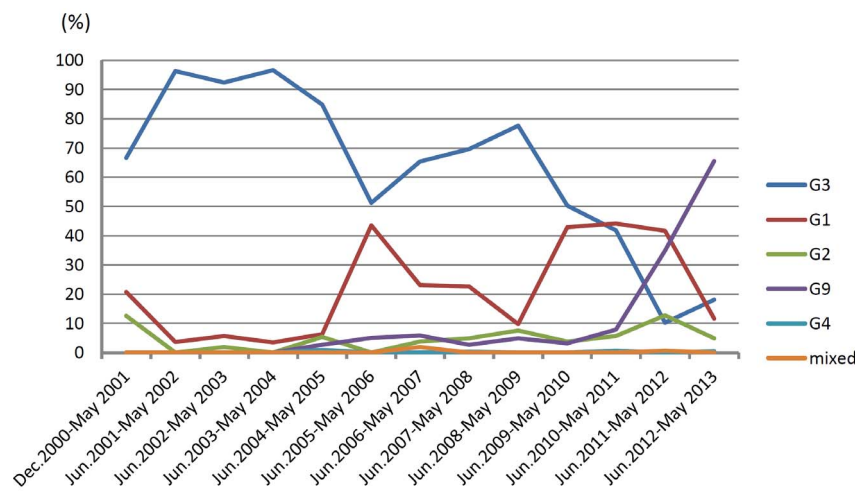

**Figure 1. Fluctuation in proportion (%) of rotavirus G types in Wuhan, China, from 2000–2001 to 2012–2013 epidemic seasons.**  
doi:10.1371/journal.pone.0088850.g001

**Table 2.** Frequency of G3P[8] RVA having RNA segment 5 (NSP1 gene) with different migration speed in PAGE.

| period             | segment 5* |        |
|--------------------|------------|--------|
|                    | E-A1-1     | E-A1-2 |
| Dec.2000–May 2001  | 16         | 0      |
| Jun.2001–May 2002  | 27         | 0      |
| Jun.2002–May 2003  | 49         | 0      |
| Jun.2003–May 2004  | 28         | 0      |
| Jun.2004–May 2005  | 95         | 0      |
| Jun.2005–May 2006  | 39         | 0      |
| Jun.2006–May 2007  | 60         | 7      |
| Jun.2007–May 2008  | 158        | 60     |
| Jun.2008–May 2009  | 51         | 90     |
| Jun.2009–May 2010  | 66         | 15     |
| Jun.2010–May 2011  | 48         | 25     |
| Jun.2011–May 2012  | 12         | 5      |
| Jun.2012–Apr. 2013 | 34         | 4      |
| total              | 683        | 206    |

\*E-A1-1 and E-A1-2 represent RNA segment 5 which migrated slower or faster in PAGE, respectively, as shown in Fig. S1.  
doi:10.1371/journal.pone.0088850.t002

contained old G3 strains detected before 2000 and vaccine strain (WI78-7 of RotaTeq). P[8] (P[8]a)-VP4 genes showed 96–100% sequence identities and clustered into three sublineages of lineage 1 (1a, 1b, and 1c) (Fig. 4). Strains in sublineages P[8]a-1a and P[8]a-1b clustered with contemporary G3 RVA from other countries and G1 RVA strains detected in Wuhan, China, while sublineage P[8]a-1c comprises only three G3 strains detected in 2004.

VP6 genes of most of the G3 strains clustered into lineage I1-1, sublineages 1a, 1b, and 1c, with contemporary G3 strains from other countries and G1 strains in China, showing identities of 97–99% (Fig. 5). Two Chinese strains (2004) and the US strain DC799 (1978) were classified into lineage I1-4 with archival strain YO, showing 89–90% identities to strains in I1 sublineages 1a, 1b, and 1c.

R1-VP1 genes from the 33 G3 strains exhibited high sequence identities (95–99%) and were differentiated into four clusters (a–d), with cluster “a” containing majority of the strains (Fig. 6). VP2 and VP3 genes (C1, M1, respectively) were highly conserved (identities of 98–99% and 98–100%, respectively) and located in a single cluster in phylogenetic trees (Fig. 7, 8). However, in VP2 gene sequence, internal 6 nucleotide-duplication was detected at two sites between nucleotide no. 89 and 90 (one strain in 2005), and no. 134 and 135 (four strains detected after 2011), associated with insertion of two amino acids, KE and KN, respectively (Fig. S2, S3).

A1-NSP1 genes were discriminated into two lineages, A1-1 (sublineages 1a and 1b) and A1-2 (sublineages 2a and 2b), which corresponded to E-A1-1- and E-A1-2-NSP1 genes defined by PAGE, respectively (Fig. 9). Sublineages 1a and 1b contained the Chinese G3 strains detected from 2000 to 2013, and contemporary G3 strains in the US, Thailand, and G1 strains in China, while all the Chinese G3 strains in lineage A1-2 were detected after 2007 and clustered with a G9P[8] strain in Belgium, two G3P[8] strains in Nicaragua, some archival and contemporary G3P[8] strains in the US [19,37]. Although high sequence identity was observed among G3 strains within lineage A1-1 (93–99%) or

A1-2 (97–100%), identities between lineages A1 and A2 were lower (83–85%).

N1-NSP2 genes were differentiated into two lineages (N1-1 and N1-2) with high identities among each lineage (98–100% and 94–99%, respectively) and lower identities between these lineages (89–91%) (Fig. 10). Lineage N1-2 contained three strains in 2000, 2006, and 2007. Most of T1-NSP3 genes were classified into a single lineage T1-1, either of two sublineages (T1-1a and T1-1b), exhibiting 94–100% identity (Fig. 11). Only one strain (E093) had an NSP3 gene assigned to lineage T1-2 (sublineage T1-2a) clustered with a G1P[8] strain E1911 detected in Wuhan, China, and showed 89–90% identities to G3 strains in T1-1 lineage.

E1-NSP4 genes of all the strains were grouped into a single lineage (E1-1), in either of the two sublineages (1a and 1b), showing high sequence identities (96–100%) (Fig. 12). Sublineage E1-1b comprised five latest G3 strains from 2011. Similarly, H1-NSP5 genes were highly conserved (identities of 97–100%) and grouped into two sublineages (1a and 1b) in a single lineage H1-1 (Fig. 13). H1-1b was latest lineage containing Chinese strains from 2010 until 2013.

Lineages in individual RNA segments of the 33 G3P[8] Chinese strains were summarized in Fig. 15 according to the year of detection. VP7, VP2, and VP3 genes belonged to a single lineage throughout the study period. Although almost no change of lineage was observed for VP1, NSP3, NSP4, and NSP5 genes until 2009, new lineages in these gene segments occurred in 2010 or 2011 and persisted thereafter. Late appearing sublineages in VP4 and VP6 genes (P[8]a-1b and I1-1c, respectively) were commonly found in strains detected after 2010. Since 2007, NSP1-A1-2 lineage has been detected together with conventional lineage NSP1-A1-1. The NSP1-A1-2 lineage was commonly associated with occurrence of new lineages in VP4, VP6, VP1, NSP2-NSP5 genes, although no fixed combination was detected. Co-occurrence of minor lineages in different RNA segments was found in older strains, i.e., A16 and L478 (VP1 and NSP2 genes), and Y111 and L148 (VP4 and VP6 genes).

# Concatenated 11 gene segments of G3P[8] RAVs

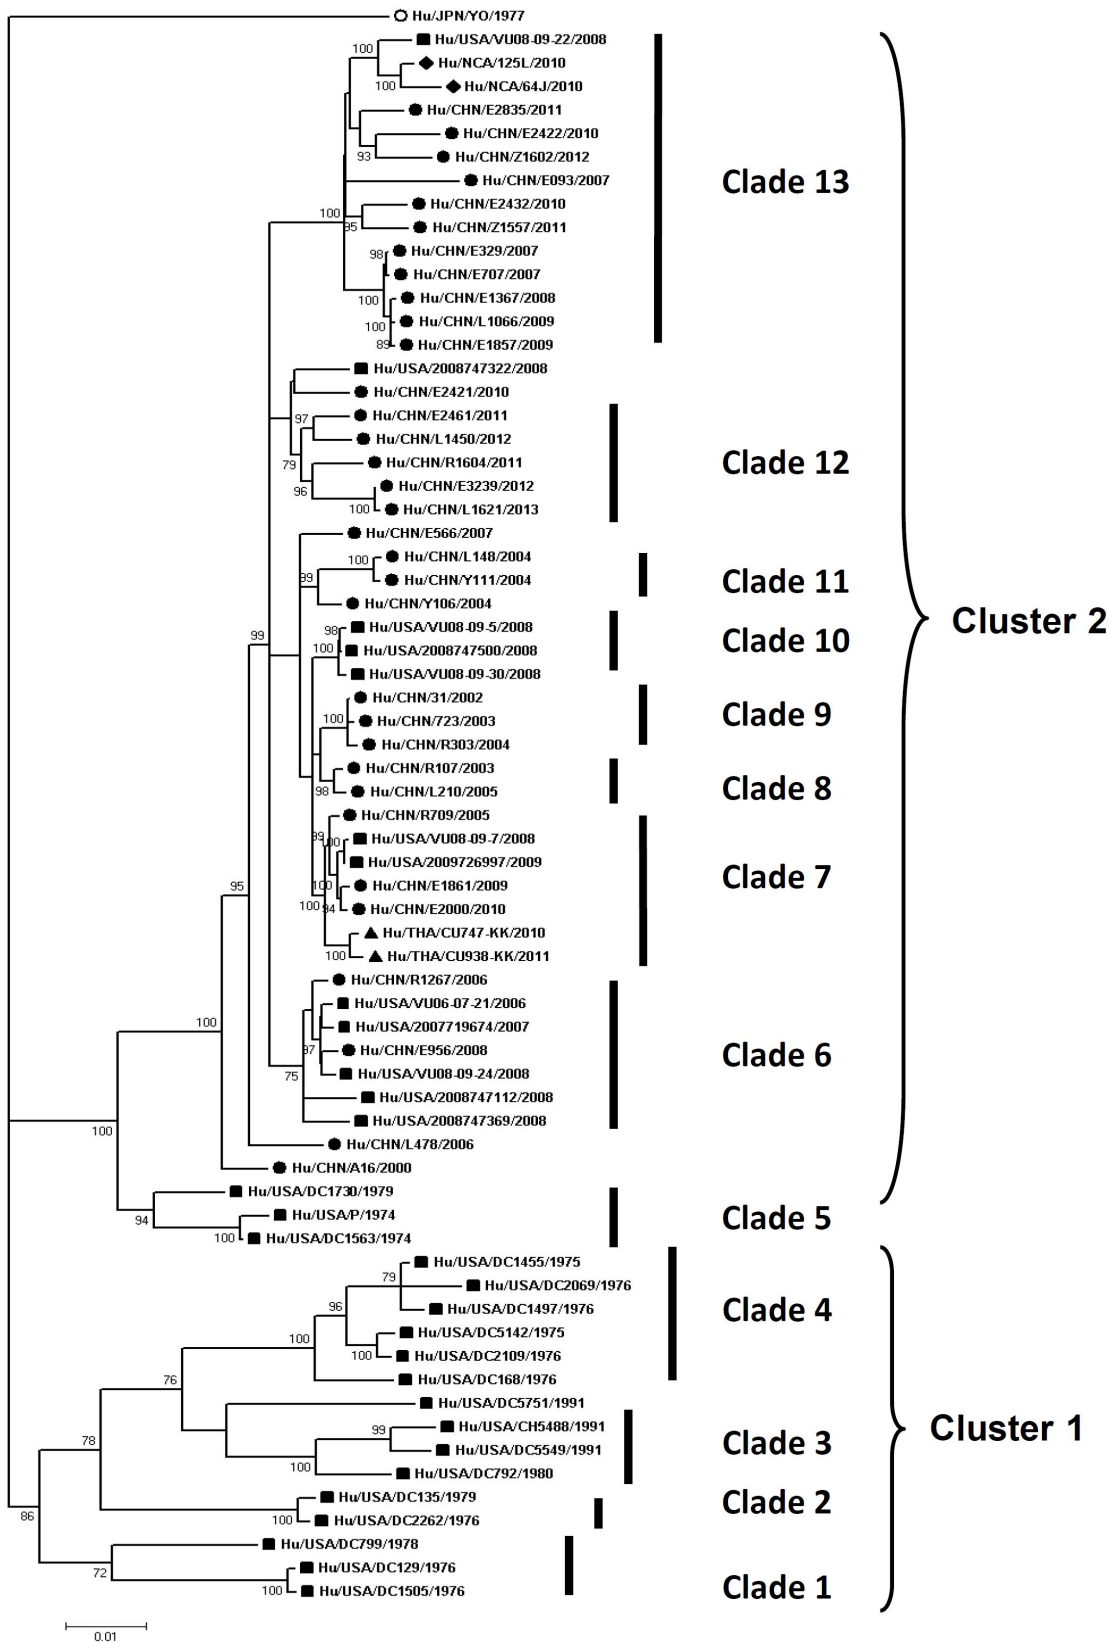



**Figure 2. Phylogenetic dendrogram constructed from concatenated sequence of all the 11 RNA segments.** Clusters and clades were assigned arbitrarily based on observation of clustering patterns, and shown on the right. In the phylogenetic tree of the concatenated sequences of G3P[8], G3P[8] strains analyzed in the present study are marked with circle, while other G3 P[8] strains with square, triangle and rhombus. Scale bars are shown below. Bootstrap values are indicated at nodes of branches.  
doi:10.1371/journal.pone.0088850.g002

## VP7-G3

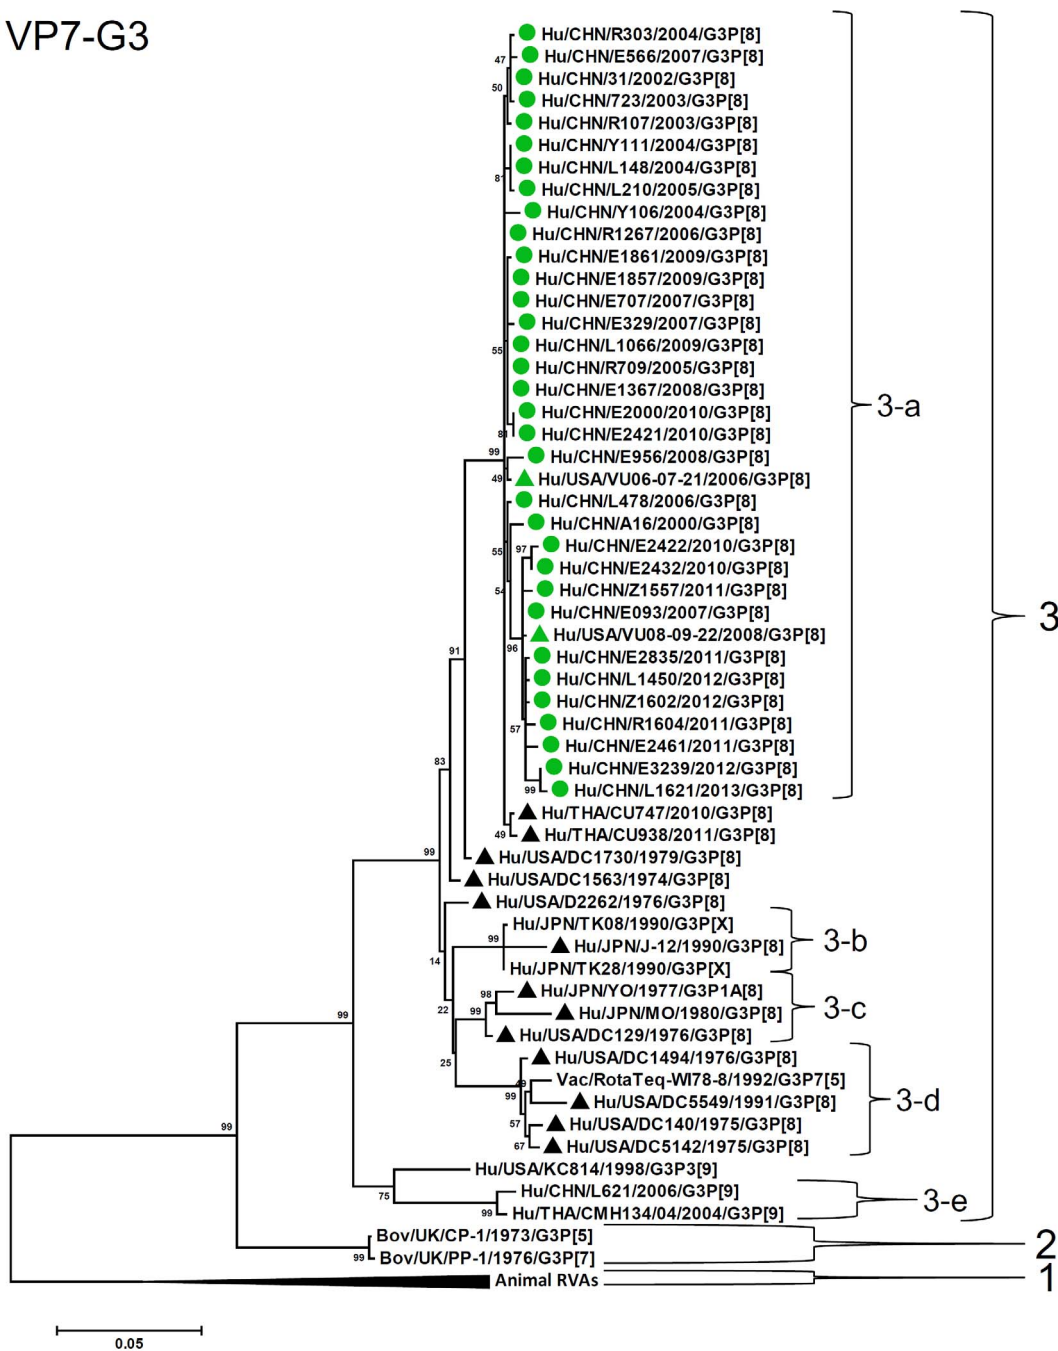

**Figure 3. Phylogenetic dendrogram constructed from VP7 gene with genotypes G3.** Lineages and sublineages within a genotype were assigned arbitrarily based on observation of clustering patterns, and shown on the right. G3P[8] strains analyzed in the present study are marked with circle, while G1P[8] strains in Wuhan, China [48], with square, and G3P[8] strains in the US reported previously [19,37] and G3P[8] strain YO with triangle. Lineages (sublineages) of above strains are discriminated by colors of the marks, i.e., green (main lineage), orange, red, pink, blue, or gray. Black triangles indicate strains outside above lineages. Colors of lineages in each RNA segment correspond to those shown in Fig. 15. Scale bars are shown below. Bootstrap values are indicated at nodes of branches.  
doi:10.1371/journal.pone.0088850.g003

VP4-P[8]

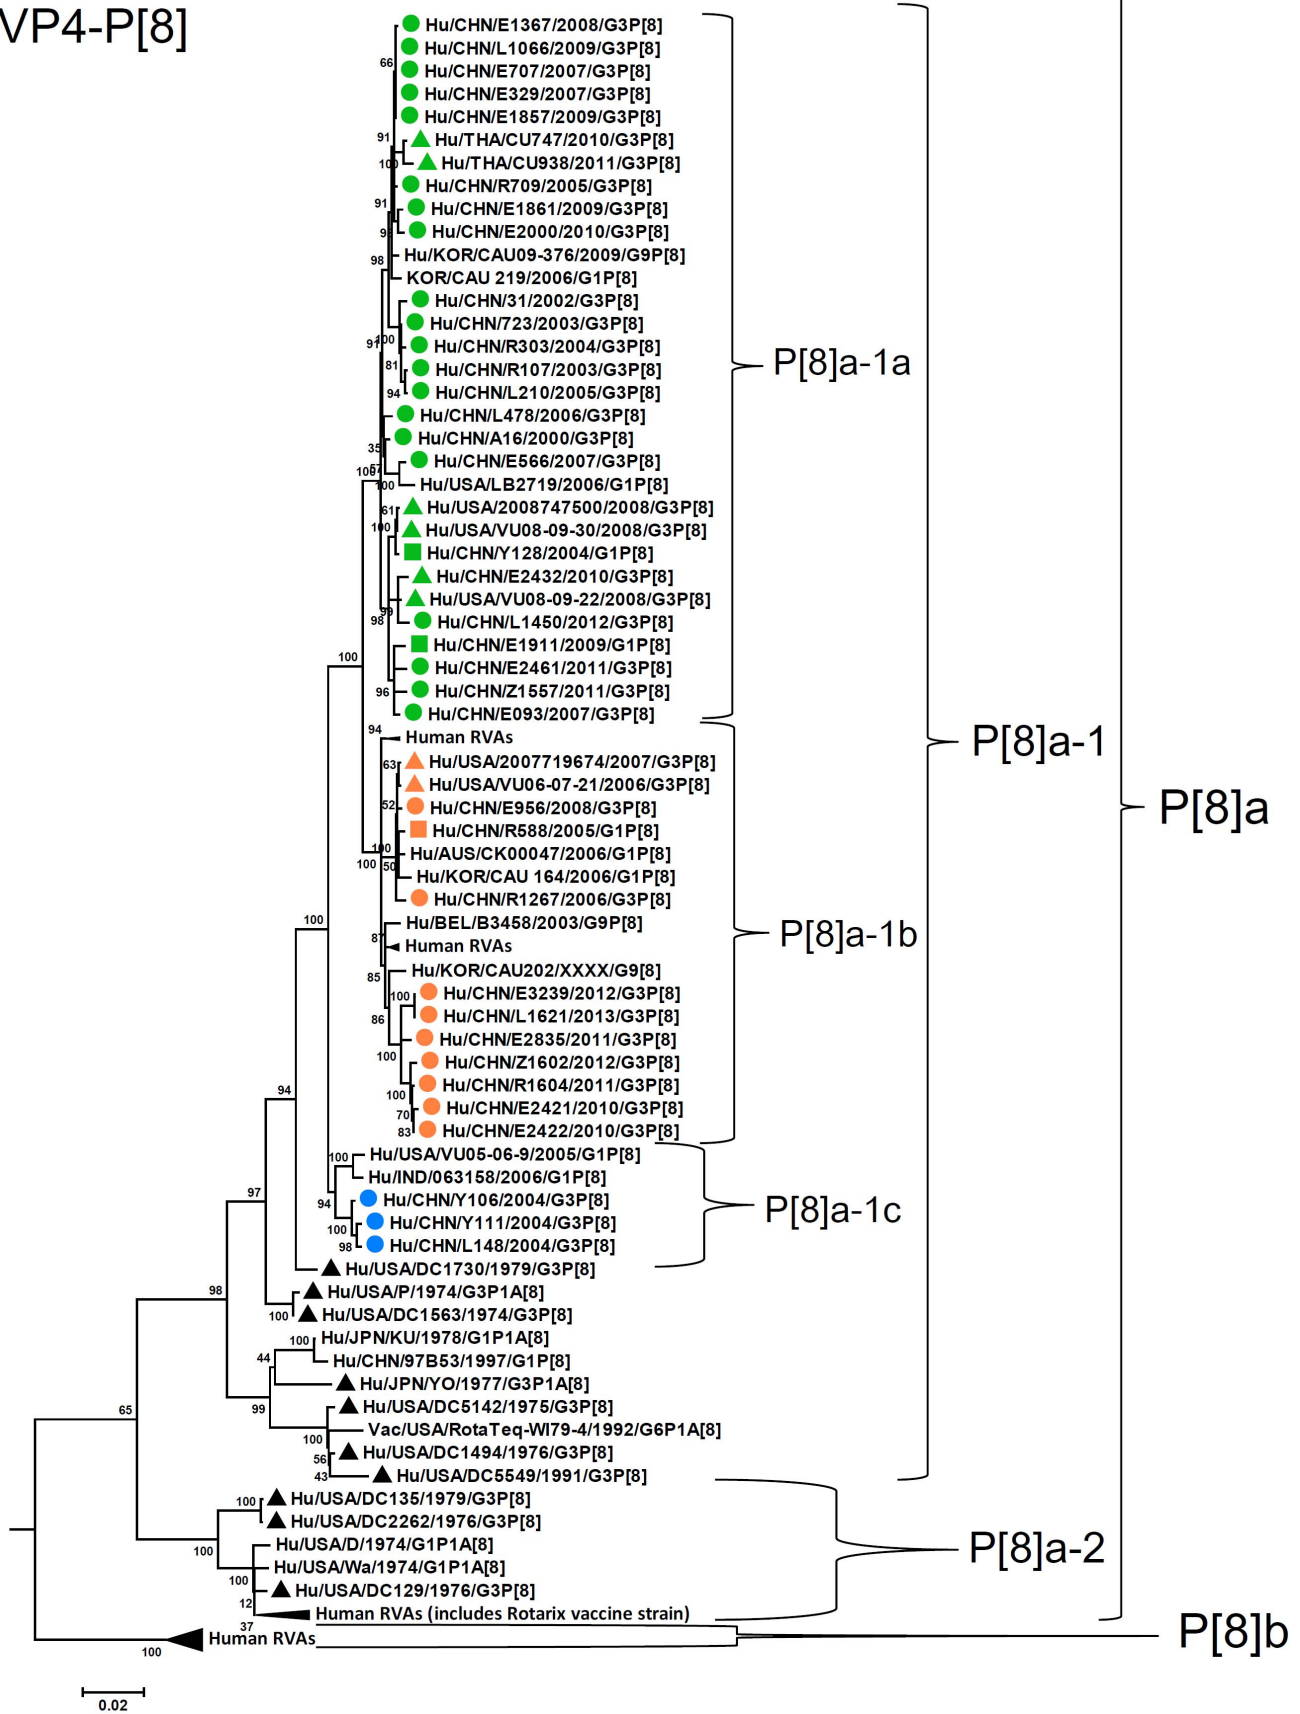

**Figure 4. Phylogenetic dendrogram constructed from VP4 gene with genotypes P[8].** See legends of Fig. 3.  
doi:10.1371/journal.pone.0088850.g004



VP6-I1

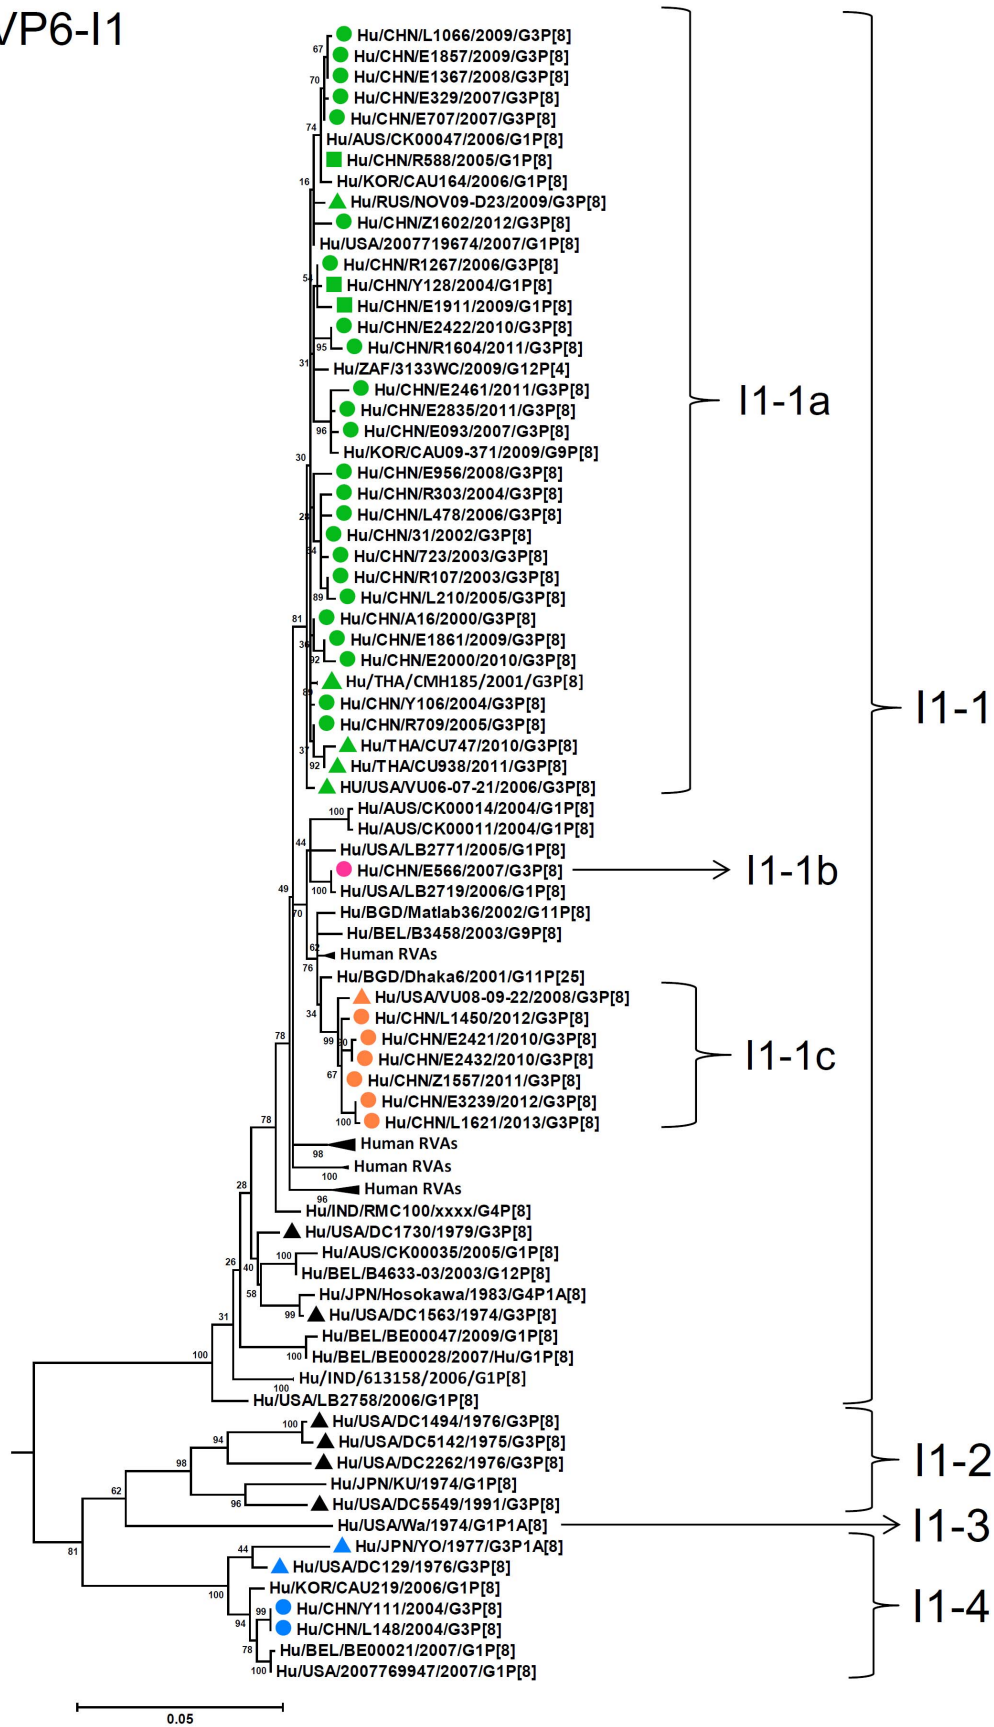

**Figure 5. Phylogenetic dendrogram constructed from VP6 gene with genotypes I1.** See legends of Fig. 3. doi:10.1371/journal.pone.0088850.g005

VP1-R1

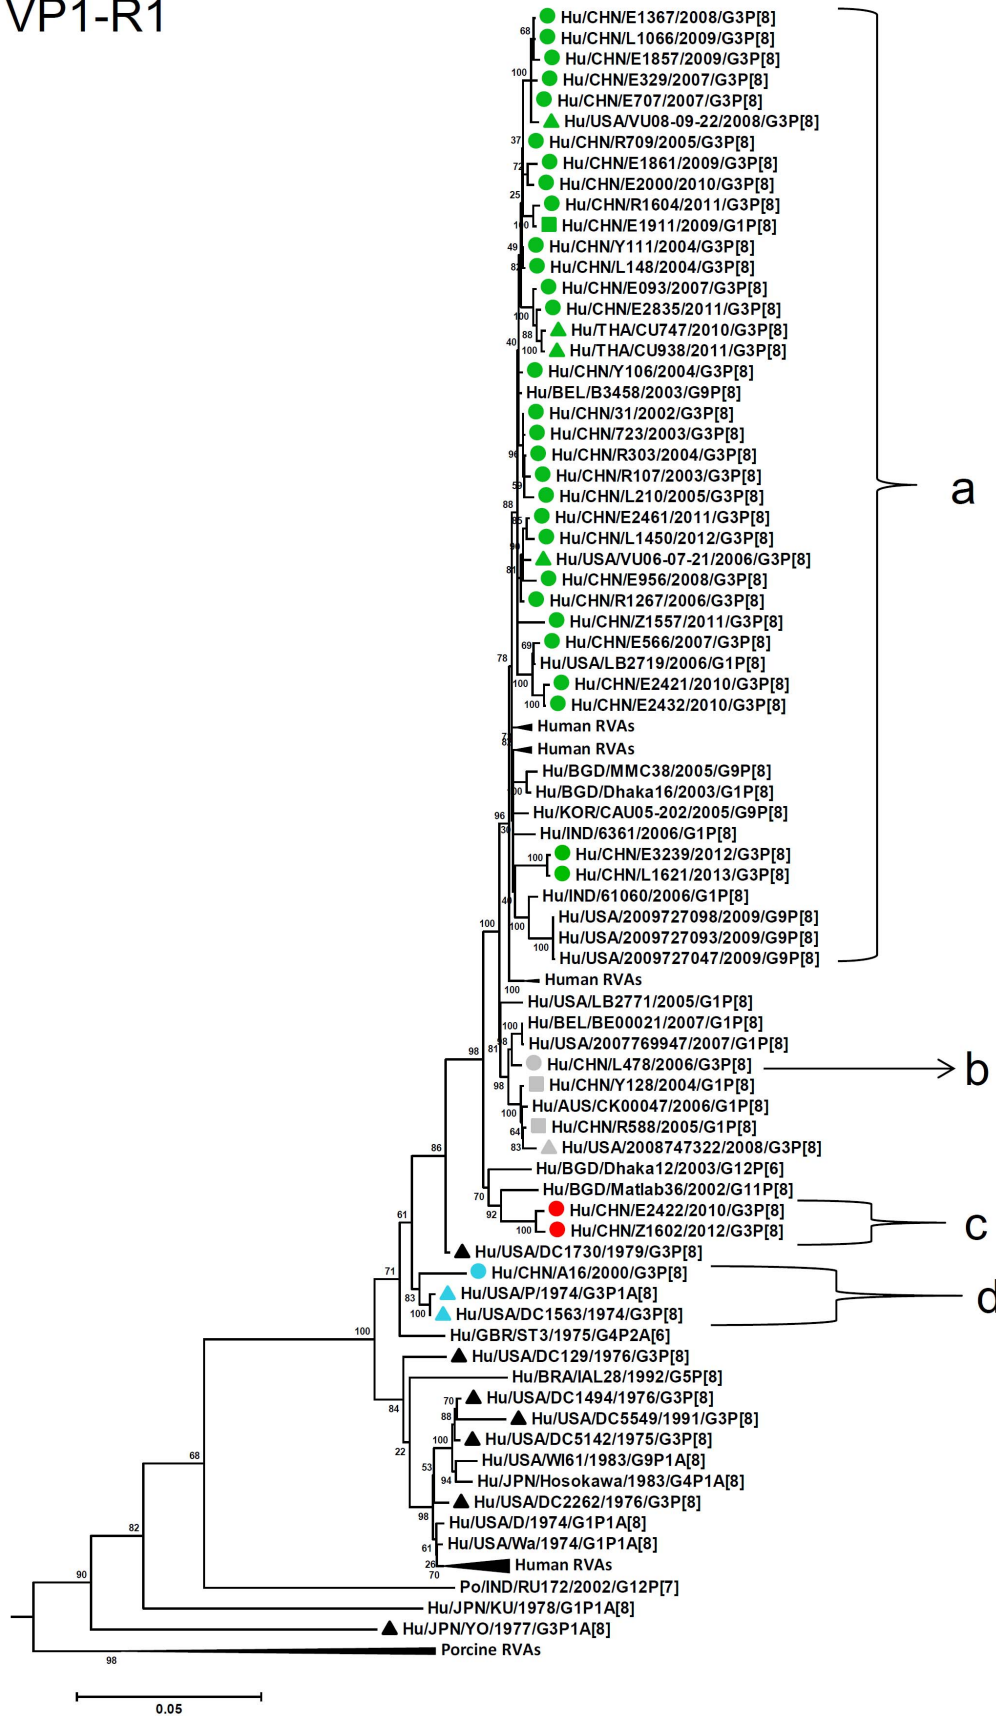

**Figure 6. Phylogenetic dendrogram constructed from VP1 gene with genotypes R1.** See legends of Fig. 3. doi:10.1371/journal.pone.0088850.g006

VP2-C1

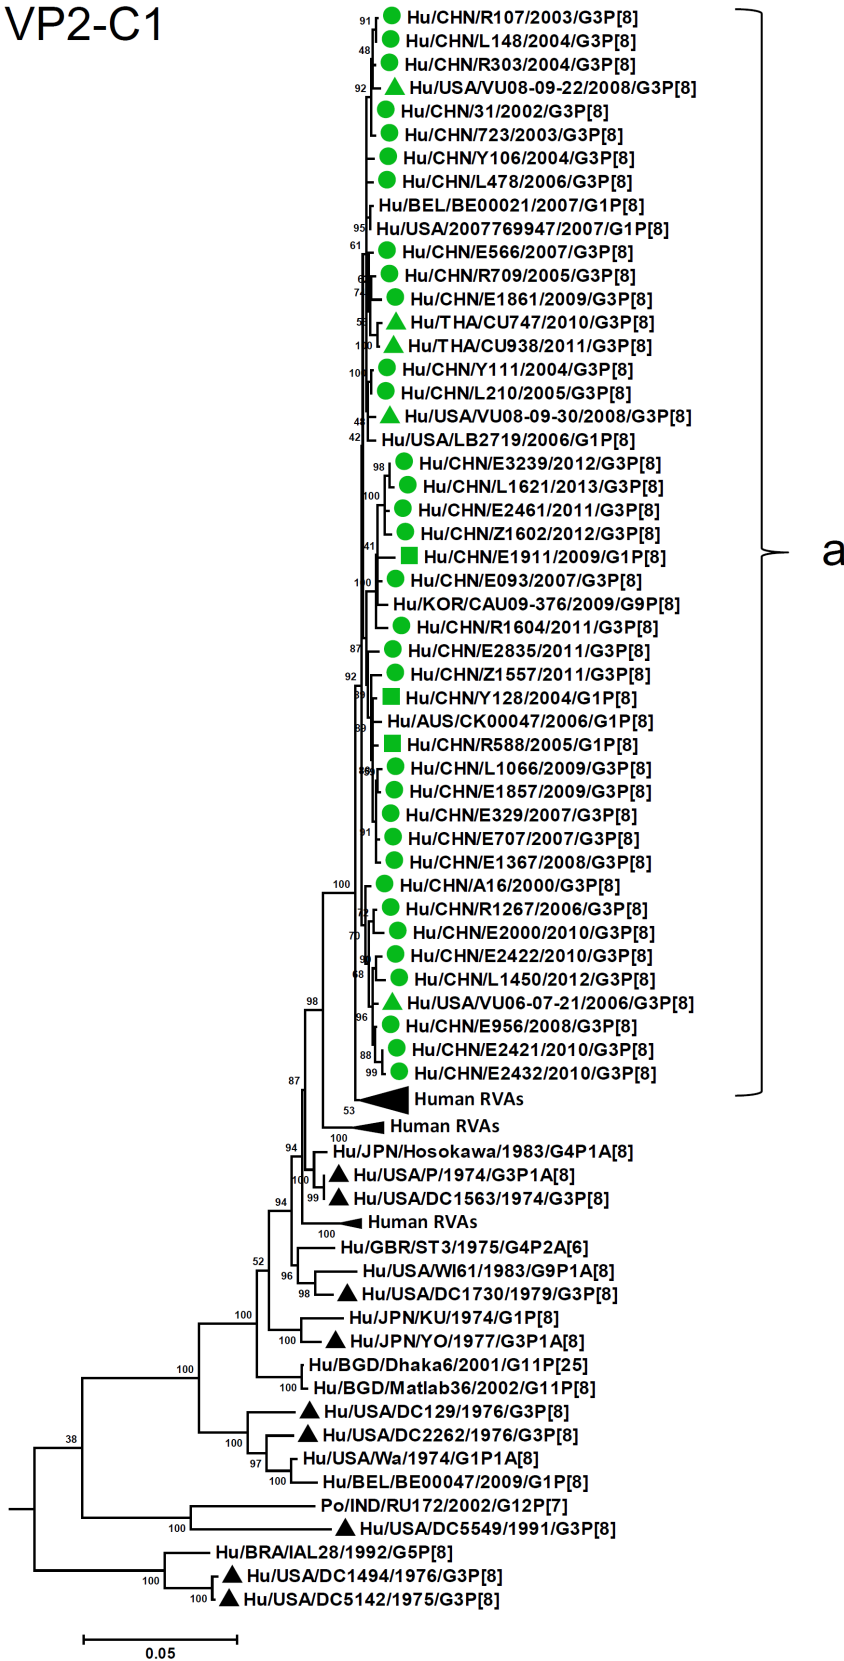

Figure 7. Phylogenetic dendrogram constructed from VP2 gene with genotypes C1. See legends of Fig. 3. doi:10.1371/journal.pone.0088850.g007

VP3-M1

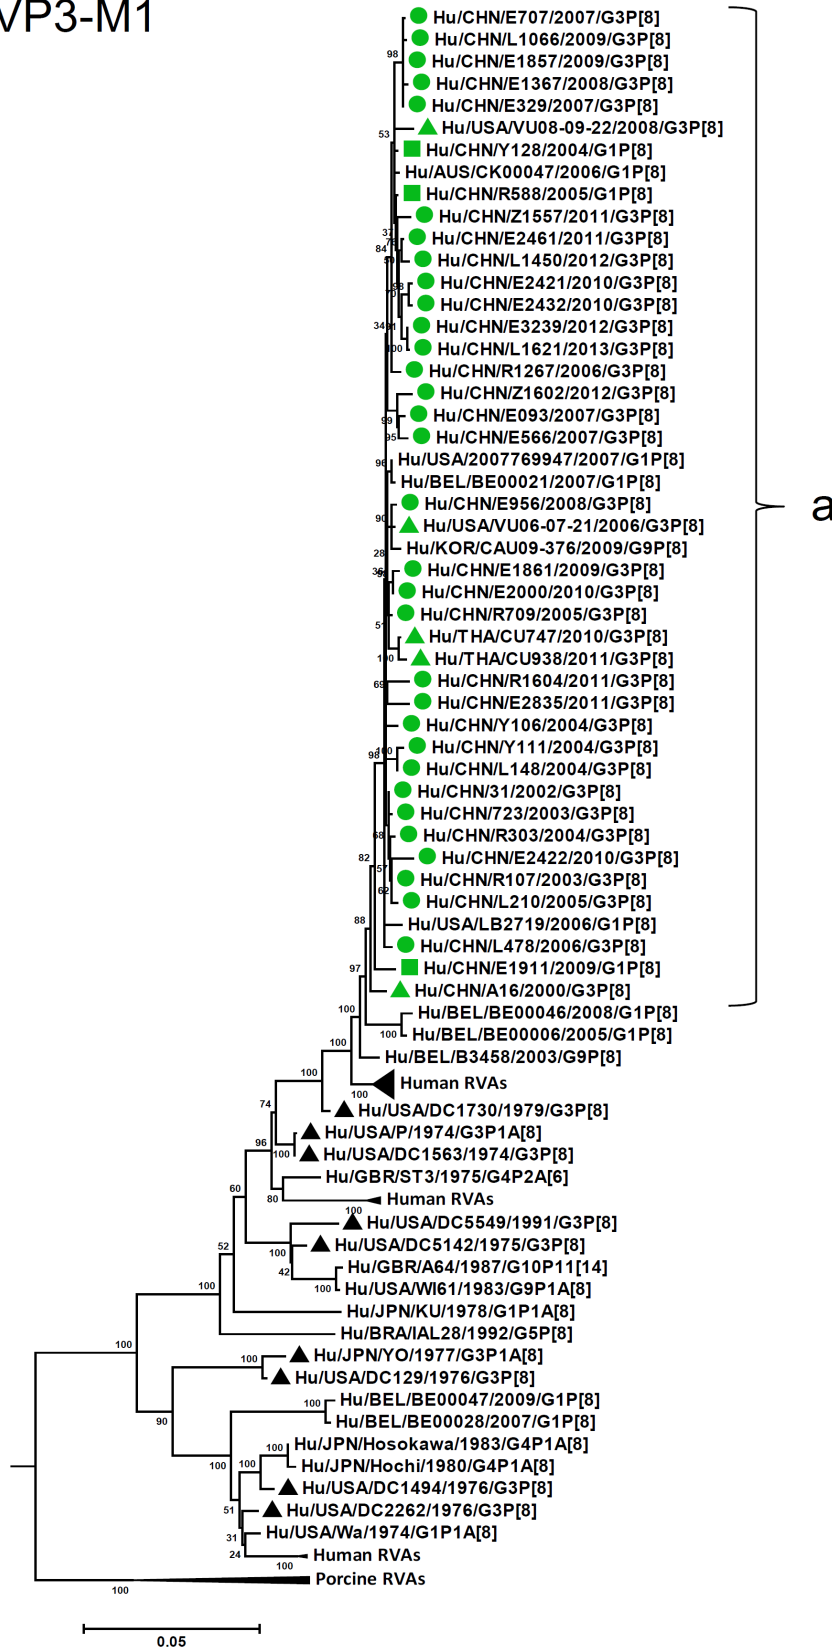

**Figure 8. Phylogenetic dendrogram constructed from VP3 gene with genotypes M1.** See legends of Fig. 3. doi:10.1371/journal.pone.0088850.g008

## NSP1-A1

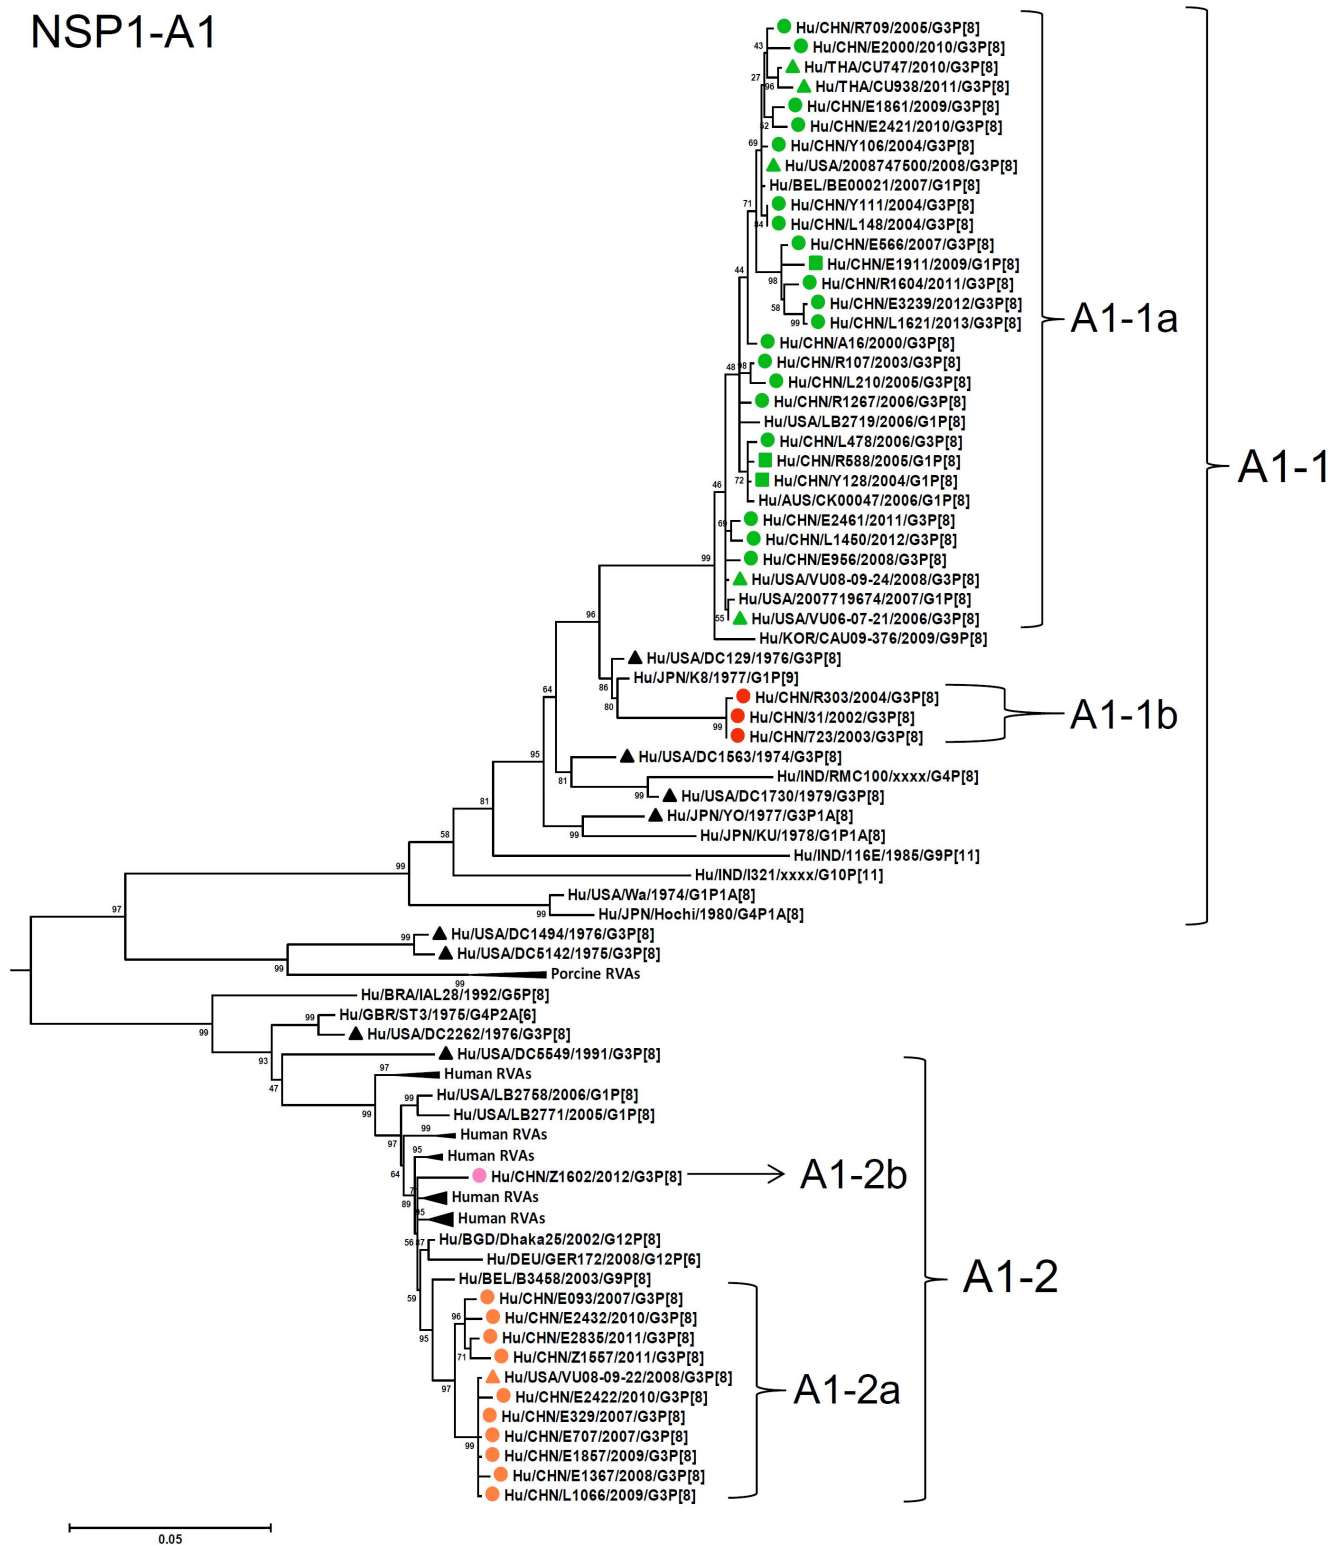

**Figure 9. Phylogenetic dendrogram constructed from NSP1 gene with genotypes A1.** See legends of Fig. 3.  
doi:10.1371/journal.pone.0088850.g009

## Amino acid difference among lineages of G3 strains

Amino acid difference in the deduced sequences of 11 viral proteins among different lineages of the 33 G3P[8] strains were investigated (Table S3), except for VP7, VP2, and VP3 with a

single lineage. NSP4 and NSP5, and VP6 showed amino acid difference in only 3–7 positions among different lineages. The most diversity was detected in NSP1 at 110 amino acid positions. The divergent positions in NSP1, as well as those in NSP2 (21



NSP2-N1

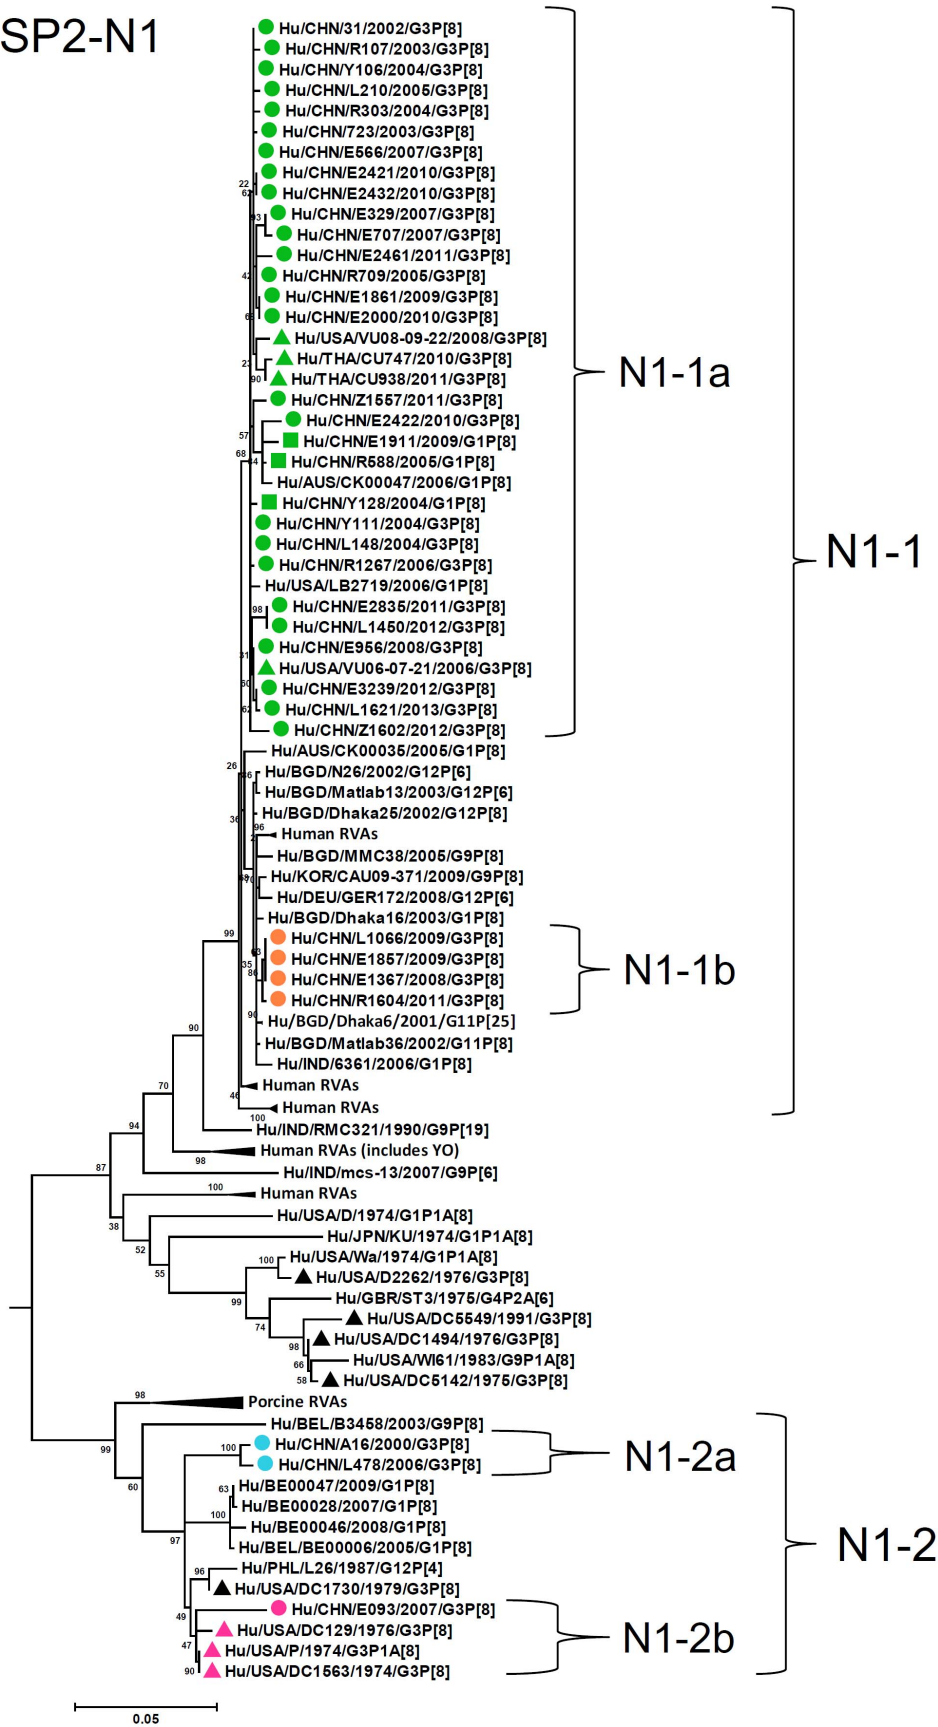

Figure 10. Phylogenetic dendrogram constructed from NSP2 gene with genotypes N1. See legends of Fig. 3. doi:10.1371/journal.pone.0088850.g010

NSP3-T1

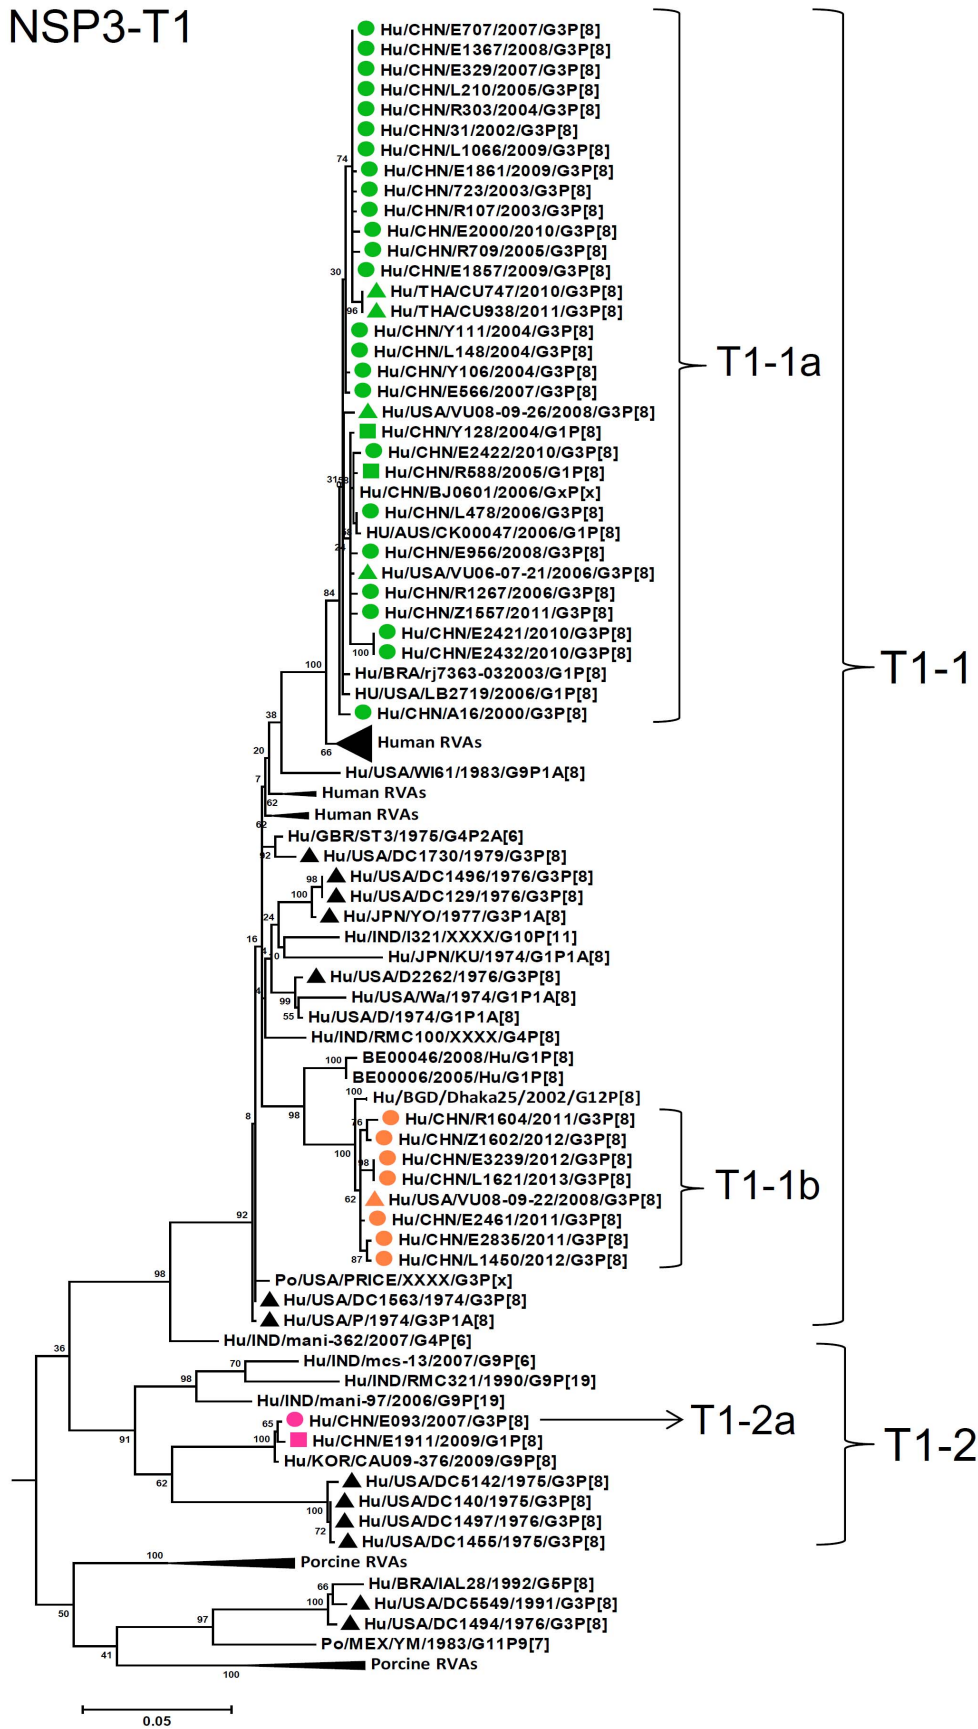

**Figure 11. Phylogenetic dendrogram constructed from NSP3 gene with genotypes T1.** See legends of Fig. 3. doi:10.1371/journal.pone.0088850.g011

NSP4-E1

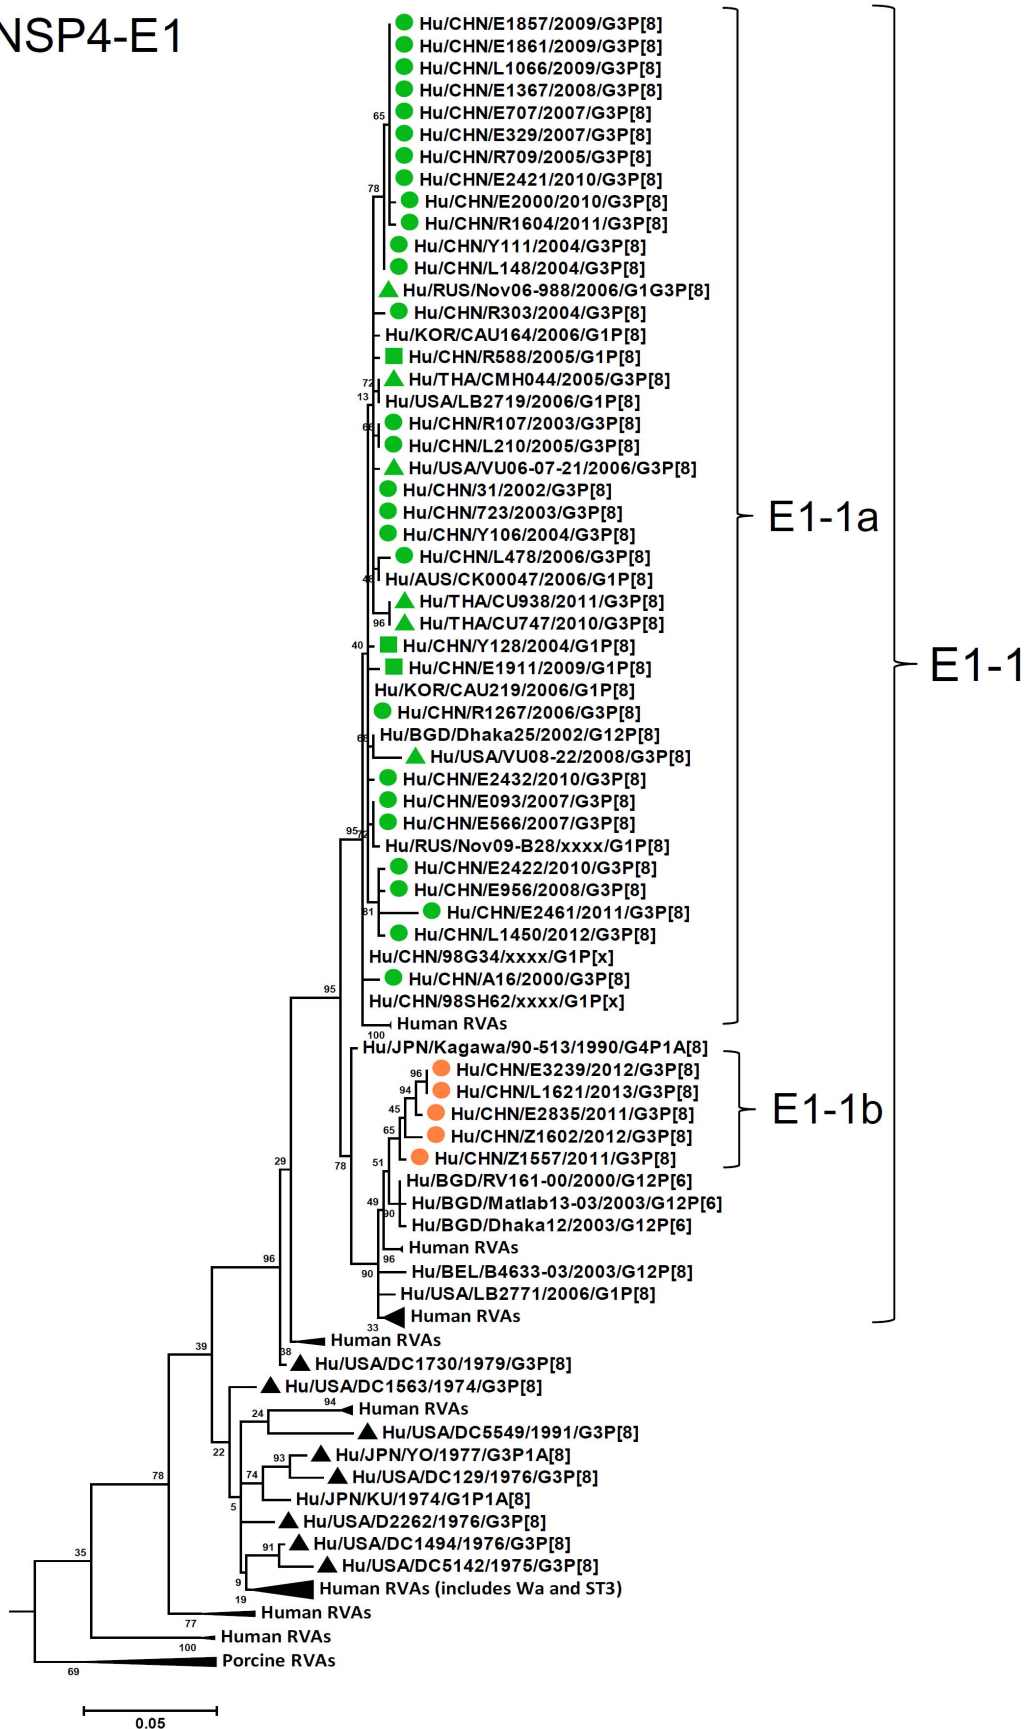

**Figure 12. Phylogenetic dendrogram constructed from NSP4 gene with genotypes E1.** See legends of Fig. 3.  
doi:10.1371/journal.pone.0088850.g012

NSP5-H1

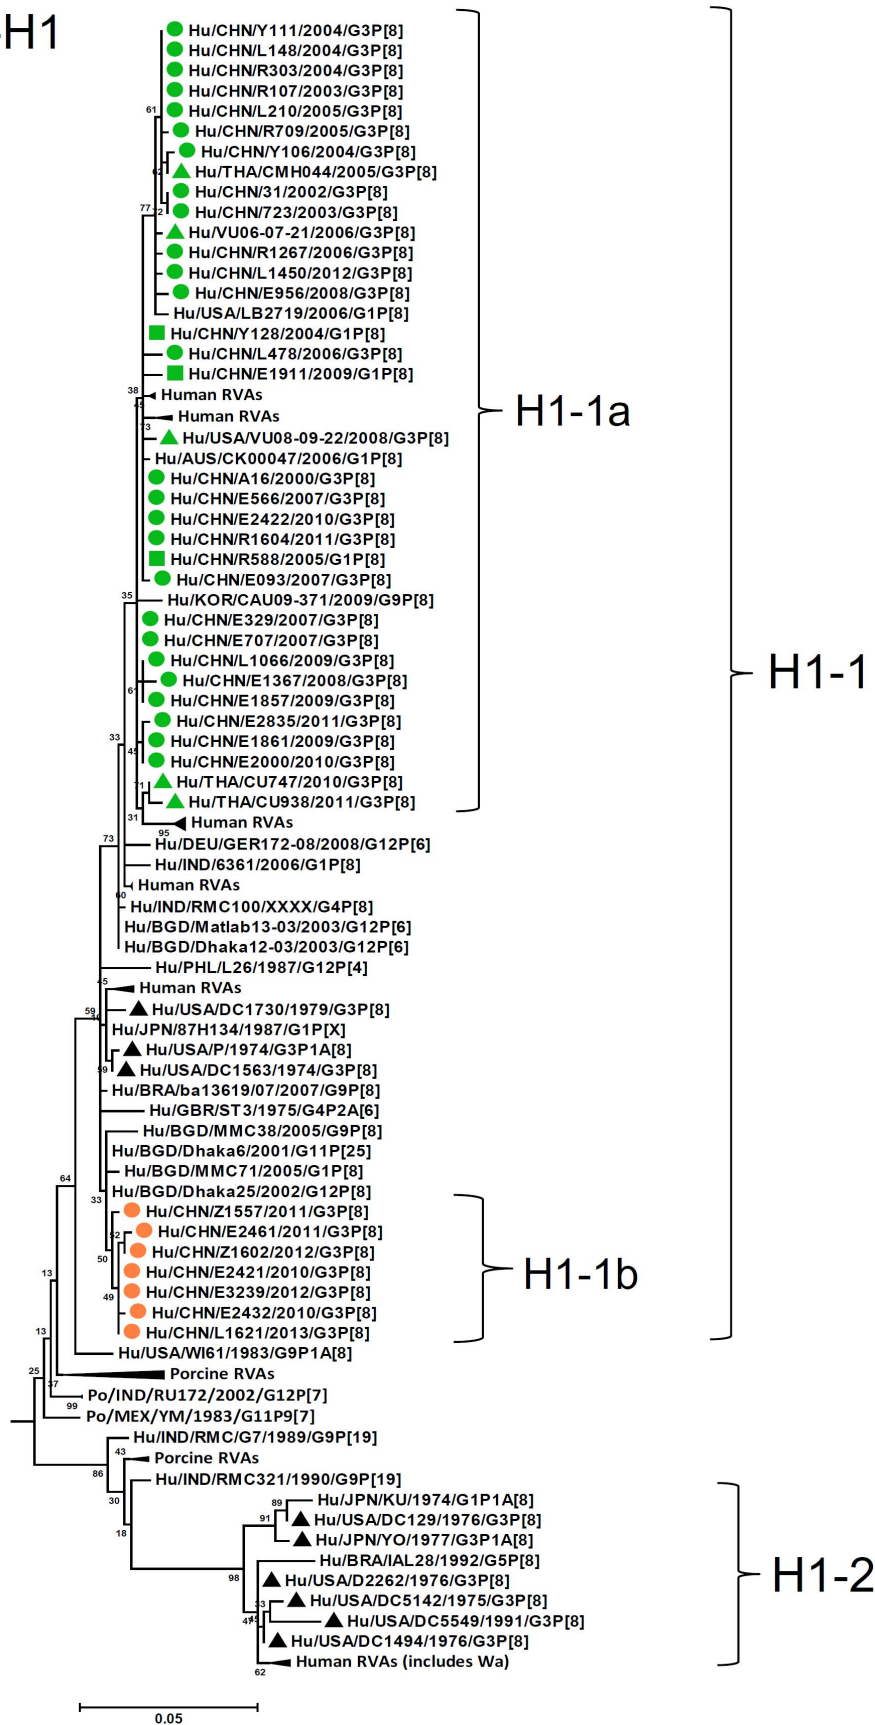

**Figure 13. Phylogenetic dendrogram constructed from NSP1 gene with genotypes H1.** See legends of Fig. 3. doi:10.1371/journal.pone.0088850.g013



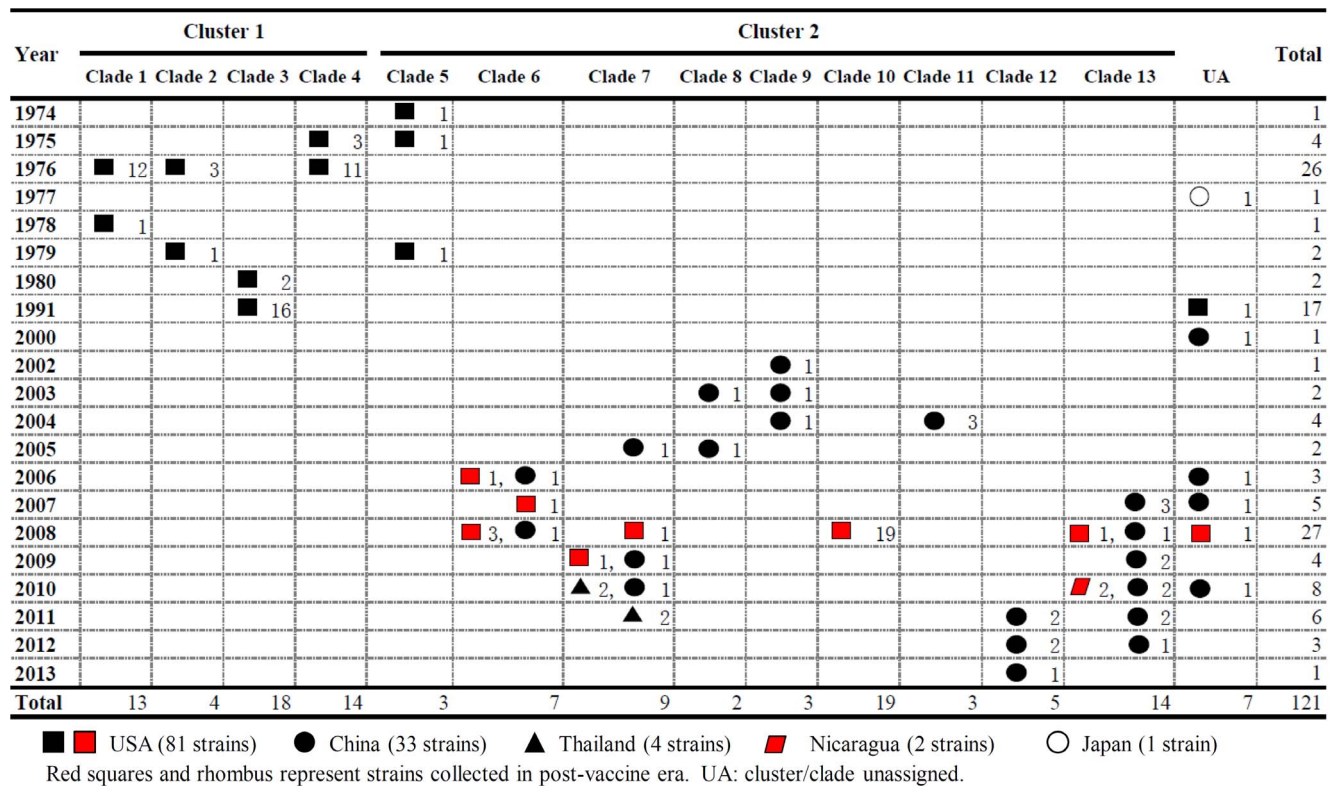

**Figure 14. Temporal and spatial distributions of the clades of G3P[8] RVA genome of total 121 strains.** Phylogenetic analysis of concatenated 11 gene segments was performed for 33 G3P[8] RVA strains in Wuhan, China, together with 88 strains in the world available in GenBank, to classify clade of each strain. Assigned clades shown on the top of this figure correspond to those in Fig. 2. Years of the detection of RVA strains are listed on the left. Symbols represent localities where the strains were collected, as shown in the bottom of the figure. The red symbols represent the strains detected in post-vaccine era. Numbers of the G3P[8] strains belonging to the same clades are shown together with the symbols. doi:10.1371/journal.pone.0088850.g014

sites) and NSP3 (33 sites), were generally scattered from N to C terminus of these proteins. However, this was not the case in VP1 and VP4, and amino acid diversity was not detected in specific regions in these proteins, e.g., amino acid no. 658–820 in VP1, and no. 339–544 in VP4.

#### Comparison of VP7 and VP4 amino acid sequences to those of vaccine strains

Amino acid residues in the surface of VP7 and VP4 responsible for neutralization have been identified by analysis of neutralization escape mutants [45,58,59]. Alignment of the amino acid residues defining the VP7 neutralization domains of G3P[8] RVA strains with G3 component (WI78-9) of pentavalent rotavirus vaccine (RotaTeq) revealed that all the Chinese G3 strains had different amino acids at three among the six positions (212, 238, and 242) in neutralization domain 7-1b (Fig. S4). In VP8\*, amino acids in two sites in neutralization domain 8-1, and a site in domain 8-3 of most of the G3 strains were different from those of two vaccine strains (Rotarix and RotaTeq) (Fig. S5). At some more sites in domains 8-1 and 8-3, amino acid residues of all the G3 strains were identical to RotaTeq, but different from Rotarix. Although VP5\* sequences of G3 strains were more close to those of vaccine strains, at the two positions in domain 5-1, amino acids distinct from two vaccine strains were shared by all the 33 G3 strains (Fig. S6).

#### Discussion

Rotaviruses are distributed globally as a major etiologic agent of infantile gastroenteritis, causing high mortality attributable to diarrhea in many African and Asian countries [1]. In terms of a global estimation, China ranked the fifth major country with rotavirus-related death [60], although estimated mortality reduced in the latest report on disease burden of rotavirus infection in Asia [7]. For prevention of severe symptoms due to rotavirus infection in children, two live vaccines, Rotarix and RotaTeq, are available and recommended for use in all countries by WHO. However, in China, these vaccines have not yet been available, although a phase III trial was conducted recently [61], and a lamb rotavirus vaccine LLR (G10P[12]) is practically used [62]. Antigenic and genetic characterizations of dominant wild rotavirus strains are essential for prediction of potential efficacy of any rotavirus vaccine, and would be also useful for development or improvement of vaccines. In the present study, we first disclosed whole genetic sequences and their characteristics of the predominant G3 rotaviruses in China.

As observed in the concatenated tree (Fig. 2), all the Chinese G3P[8] rotaviruses detected from 2000 to 2013 were genetically grouped into a single cluster (cluster 2), which was distinct from another cluster comprising G3 strains in the US before 1991 (cluster 1). Within the cluster 2, three old US strains in the 1970's clustered in clade 5 which is phylogenetically isolated from all other clades including Chinese G3 strains. Some of the recent US G3 strains in 2006–2008 (e.g., VU-08-09-30) were genetically close



| Strain                             | Genotype |      |     |     |     |     |      |      |      |      |      |
|------------------------------------|----------|------|-----|-----|-----|-----|------|------|------|------|------|
|                                    | VP7      | VP4  | VP6 | VP1 | VP2 | VP3 | NSP1 | NSP2 | NSP3 | NSP4 | NSP5 |
| RVA/Human-wt/CHN/A16/2000/G3P[8]   | G3       | P[8] | I1  | R1  | C1  | M1  | A1   | N1   | T1   | E1   | H1   |
| RVA/Human-wt/CHN/S1/2002/G3P[8]    | G3       | P[8] | I1  | R1  | C1  | M1  | A1   | N1   | T1   | E1   | H1   |
| RVA/Human-wt/CHN/T23/2003/G3P[8]   | G3       | P[8] | I1  | R1  | C1  | M1  | A1   | N1   | T1   | E1   | H1   |
| RVA/Human-wt/CHN/R107/2003/G3P[8]  | G3       | P[8] | I1  | R1  | C1  | M1  | A1   | N1   | T1   | E1   | H1   |
| RVA/Human-wt/CHN/R303/2004/G3P[8]  | G3       | P[8] | I1  | R1  | C1  | M1  | A1   | N1   | T1   | E1   | H1   |
| RVA/Human-wt/CHN/Y106/2004/G3P[8]  | G3       | P[8] | I1  | R1  | C1  | M1  | A1   | N1   | T1   | E1   | H1   |
| RVA/Human-wt/CHN/Y111/2004/G3P[8]  | G3       | P[8] | I1  | R1  | C1  | M1  | A1   | N1   | T1   | E1   | H1   |
| RVA/Human-wt/CHN/L148/2004/G3P[8]  | G3       | P[8] | I1  | R1  | C1  | M1  | A1   | N1   | T1   | E1   | H1   |
| RVA/Human-wt/CHN/L210/2005/G3P[8]  | G3       | P[8] | I1  | R1  | C1  | M1  | A1   | N1   | T1   | E1   | H1   |
| RVA/Human-wt/CHN/R709/2005/G3P[8]  | G3       | P[8] | I1  | R1  | C1  | M1  | A1   | N1   | T1   | E1   | H1   |
| RVA/Human-wt/CHN/L478/2006/G3P[8]  | G3       | P[8] | I1  | R1  | C1  | M1  | A1   | N1   | T1   | E1   | H1   |
| RVA/Human-wt/CHN/R1267/2006/G3P[8] | G3       | P[8] | I1  | R1  | C1  | M1  | A1   | N1   | T1   | E1   | H1   |
| RVA/Human-wt/CHN/E093/2007/G3P[8]  | G3       | P[8] | I1  | R1  | C1  | M1  | A1   | N1   | T1   | E1   | H1   |
| RVA/Human-wt/CHN/E329/2007/G3P[8]  | G3       | P[8] | I1  | R1  | C1  | M1  | A1   | N1   | T1   | E1   | H1   |
| RVA/Human-wt/CHN/E566/2007/G3P[8]  | G3       | P[8] | I1  | R1  | C1  | M1  | A1   | N1   | T1   | E1   | H1   |
| RVA/Human-wt/CHN/E707/2007/G3P[8]  | G3       | P[8] | I1  | R1  | C1  | M1  | A1   | N1   | T1   | E1   | H1   |
| RVA/Human-wt/CHN/E956/2008/G3P[8]  | G3       | P[8] | I1  | R1  | C1  | M1  | A1   | N1   | T1   | E1   | H1   |
| RVA/Human-wt/CHN/E1367/2008/G3P[8] | G3       | P[8] | I1  | R1  | C1  | M1  | A1   | N1   | T1   | E1   | H1   |
| RVA/Human-wt/CHN/L1066/2009/G3P[8] | G3       | P[8] | I1  | R1  | C1  | M1  | A1   | N1   | T1   | E1   | H1   |
| RVA/Human-wt/CHN/E1857/2009/G3P[8] | G3       | P[8] | I1  | R1  | C1  | M1  | A1   | N1   | T1   | E1   | H1   |
| RVA/Human-wt/CHN/E1861/2009/G3P[8] | G3       | P[8] | I1  | R1  | C1  | M1  | A1   | N1   | T1   | E1   | H1   |
| RVA/Human-wt/CHN/E2000/2010/G3P[8] | G3       | P[8] | I1  | R1  | C1  | M1  | A1   | N1   | T1   | E1   | H1   |
| RVA/Human-wt/CHN/E2421/2010/G3P[8] | G3       | P[8] | I1  | R1  | C1  | M1  | A1   | N1   | T1   | E1   | H1   |
| RVA/Human-wt/CHN/E2422/2010/G3P[8] | G3       | P[8] | I1  | R1  | C1  | M1  | A1   | N1   | T1   | E1   | H1   |
| RVA/Human-wt/CHN/E2432/2010/G3P[8] | G3       | P[8] | I1  | R1  | C1  | M1  | A1   | N1   | T1   | E1   | H1   |
| RVA/Human-wt/CHN/R1604/2011/G3P[8] | G3       | P[8] | I1  | R1  | C1  | M1  | A1   | N1   | T1   | E1   | H1   |
| RVA/Human-wt/CHN/E2461/2011/G3P[8] | G3       | P[8] | I1  | R1  | C1  | M1  | A1   | N1   | T1   | E1   | H1   |
| RVA/Human-wt/CHN/Z1557/2011/G3P[8] | G3       | P[8] | I1  | R1  | C1  | M1  | A1   | N1   | T1   | E1   | H1   |
| RVA/Human-wt/CHN/E2835/2011/G3P[8] | G3       | P[8] | I1  | R1  | C1  | M1  | A1   | N1   | T1   | E1   | H1   |
| RVA/Human-wt/CHN/Z1602/2012/G3P[8] | G3       | P[8] | I1  | R1  | C1  | M1  | A1   | N1   | T1   | E1   | H1   |
| RVA/Human-wt/CHN/L1450/2012/G3P[8] | G3       | P[8] | I1  | R1  | C1  | M1  | A1   | N1   | T1   | E1   | H1   |
| RVA/Human-wt/CHN/E3239/2012/G3P[8] | G3       | P[8] | I1  | R1  | C1  | M1  | A1   | N1   | T1   | E1   | H1   |
| RVA/Human-wt/CHN/L1621/2013/G3P[8] | G3       | P[8] | I1  | R1  | C1  | M1  | A1   | N1   | T1   | E1   | H1   |

**Figure 15. Genotype nature of the eleven gene segments of G3P[8] human rotavirus strains detected in Wuhan, China, from 2000 to 2013.** Various colors have been used to highlight the different phylogenetic lineages or sublineages (assigned arbitrarily) observed within a genotype which correspond to those shown in Fig. 3–13. The common name of a strain is underlined. doi:10.1371/journal.pone.0088850.g015

to Chinese strains in 2006–2012, and belonged to the new variant G3 rotavirus (Table S1). These findings suggest that genome of G3 strains might have evolved as a whole chronologically, and modern G3 rotaviruses in China, Thailand, the US and Nicaragua are genetically related to some old G3 rotavirus in the US (clade 5 in cluster2). When combined with the phylogenetic trees (Fig. 3–13) of each segment, it is possible to consider that the new variant G3 rotavirus might be derived from one of the old G3 strains, such as those classified into clade 5, occurred in Asia in the late 1990's, and evolved through genetic drift and intra-genotype reassortment of NSP2 gene, spreading globally thereafter.

In the present study, evolutionary pattern of G3 RVA strains in China between 2000 and 2013 was elucidated. While main lineages of individual gene segments persisted during the study period (Fig. 15, lineages with green), different lineages appeared occasionally in RNA segments encoding VP1, VP4, VP6, and NSP1-NSP5, exhibiting various allele constellations. No definite pattern was found for combination of RNA segments with non-major lineages, except for a few strains, e.g., strains Y111 and L148 having VP4 and VP6 genes with the same, minor lineages (P[8]a-1c, I1-4, respectively) (Fig. 15). Although the Chinese G3 RVA strains before 2009 had all, or at least 8 RNA segments belonging to main lineages, all the analyzed strains after 2010 contained 2–6 RNA segments with non-major lineages. Some of the RNA segments with minor lineages were revealed to be genetically related to non-G3 RVA strains. For example, minor lineage P[8]a-1c of VP4 gene and I1-4 of VP6 gene found in

strains Y111, L148 and DC799 clustered with contemporary G1P[8] strains, suggesting that these genes were introduced from other RVA such as G1P[8] strain via reassortment. Hence, the Chinese G3P[8] RVA strains are considered to have evolved since 2000 by intragenogroup reassortment with co-circulating strains, which occurred randomly in most RNA segments, accumulating more reassorted RNA segments over the years. However, only a single cluster was found for VP7, VP2, VP3 genes throughout the study period, indicating that no reassortment event has occurred for these genes. Based on these observations, it may be speculated that these viral structural genes were more stable compared to the other RVA genes. Only a mutation in VP2 gene, i.e., duplication of 6-nucleotide sequence was detected in some strains in 2005 and after 2011. This mutation was not related to any specific allelic constellation. Despite with a similarity to rearrangement which causes partial duplication of gene segments [47], this mutation appears to be a novel evolutionary event distinct from rearrangement because only a short nucleotide sequence is duplicated within an amino acid coding region of a structural protein gene, in RVA strains detected in common diarrheal specimens.

Evolutionary pattern of the G3 RVA in the US from 1974 to 1991, and 2007–2009 reported by McDonald et al. [19,37] appears to be different from the Chinese G3 strains described above. G3 RVAs in the US, belonging to Wa-like genotype constellation, were discriminated into four major clades with distinct lineages in the whole RNA segments. Three clades persisted from 1974 to 1979, and a single clade was detected in

1991, as well as in 2007–2009, and reassortant among different clades was rarely identified. In contrast, G1P[8] RVA from 2006–2009 comprised with strains with various allele constellations, showing occurrence of intragenogroup reassortment among the co-circulating strains. In these studies, G1P[8] was described as the major genotype in the study period from 1974–1976, 1977–1989, and 2005–2008, while G3 was dominant occasionally, in 1976, 1991, 2008–2009. Thus, heterogeneity via reassortment was observed mostly among dominant genotype, i.e., G1P[8] strain in the US. Similarly, in China, RVA with dominant type G3P[8] was revealed to be heterogeneous in the present study, although RVA with other genotypes have not yet been well characterized. It is suggested that the rotavirus strains with dominant genotype may transmit among population more frequently than other genotypes, and have more chance to cause mixed infection with other rotaviruses belonging to different clades within the same genotype, yielding reassortants with various allelic constellation. Persistence of specific allele constellation in nature may be related to various factors, e.g., fitness of the whole gene segments, replication efficacy of the resultant viruses, and immune response to viral proteins, which remain to be elucidated.

It was of note that distinct NSP1 lineage (A1-2) emerged among G3 rotaviruses in 2007, while conventional lineage (A1-1) which is found in common RVA worldwide persisted throughout the study period. Phylogenetically, A1-2 NSP1 gene of the Chinese G3P[8] RV strains clustered with G3 strains in the US (1975–1991, 2008) and Nicaragua (2010), G1, G9, G12 RVA strains detected worldwide. Although origin of the A1-2 NSP1 gene is not evident, this gene is suggested to be derived from circulating human RVA strains with common genotypes (Fig. 9), and actually A1-1 and A1-2 are considered as two major lineages of A1-NSP1 gene among human rotaviruses. Although the A1-2 NSP1 gene (E-A1-2-segment 5 in PAGE) surpassed A1-1 in the 2008–2009 season, thereafter its frequency decreased gradually. NSP1, one of the RNA-binding proteins [2], is known to be highly divergent in its sequence among rotaviruses proteins, except for a conserved N-terminus cysteine-rich motif [63]. NSP1 is implicated in evasion of innate immune response by inhibiting induction of interferon (IFN) and NF $\kappa$ B activation, and delaying early cellular apoptosis [64–66]. Cellular type I IFN response is suppressed by function of NSP1 as an E3 ubiquitin ligase, through proteasome-dependent degradation of IFN regulatory factors (IRF)-3, -5, and -7 [64,67]. Different suppression levels for type I IFN response as well as targeted molecules by NSP1 were observed depending on rotavirus strains having genetically distinct NSP1 genes [68,69]. Although such a functional difference has not yet been elucidated by NSP1 genes belonging to different lineages within a single genotype, it is possible that the lineage switching in NSP1 gene over the years observed in the present study might be related to certain functional difference of NSP1 with different lineages, associated with immune response to dominant lineage of NSP1.

It was noted that NSP3 gene of a single G3 strain E093 in 2007 (lineage T1-2) was close to that of G1P[8] strain E1911 detected in Wuhan, China, in 2009 [48]. As observed for the strain E1911, NSP3 genes of these strains clustered near those of porcine-like human G9 strains in India in the lineage T1-2. Thus, it is suggested that G3 strain E093 might have acquired its NSP3 gene via intragenotype reassortment, possibly from porcine or porcine-like human RVAs. The fact that such porcine-like NSP3 gene was detected in G1 and G3 strains suggests persistence and potential spread of the gene segment of the zoonotic origin among common genotypes of human rotaviruses. To determine its significance, further surveillance of rotavirus may be required for the NSP3 gene of local human and porcine rotaviruses.

Compared with the two vaccine strains, some mismatches were found in deduced VP7 and VP4 (VP8\* and VP5\*) amino acid sequences of the G3 rotavirus strains in China, as reported for wild human RVA strains detected in the 2000's [45,48]. In contrast to VP7 of G1P[8] RVA in Wuhan, China, or in Belgium, exhibiting mismatched amino acids located mostly in antigenic epitope 7-1a compared with vaccine strains, G3 strains in the present study showed amino acid divergence mostly in epitope 7-1b compared with G3 component of RotaTeq, which was similar finding to G3 strains in Belgium [45]. In VP4 sequence of G3 rotaviruses in the present study, most of mismatched amino acids and their locations compared with two vaccine strains were similar to those found in G1 strains in China, and G1 and G3 strains in Belgium (positions 146, 190, 196, 113, 125, 131, 135, 384, 386). These findings suggest that the VP7 and VP4 of recent human RVA have been subjected to similar genetic evolution with regard to antigenic regions, from old rotavirus strains which include the components in the current vaccines. In China, phase III trial of Rotarix conducted recently showed substantial level of protection against severe rotavirus gastroenteritis in children less than two years of age [61]. Therefore, it is suggested that amino acid diversity in VP7 and VP4 observed in modern G3 rotaviruses might not affect efficacy of the rotavirus vaccine. Nevertheless, by global introduction and use of rotavirus vaccines, it is suggested that more amino acid substitutions may occur through escape from neutralizing antibody evoked to the vaccine strains, which is suggested to influence the efficacy of current rotavirus vaccine. Hence, monitoring of the VP4 and VP7 sequences of common wild strains will be significant to speculate on the potential effectiveness of vaccine strains. In addition to antibody response to VP4 and VP7, antibodies elicited against VP2, VP6, NSP2, and NSP4 are also considered to confer protection to host against rotavirus infection [70]; accordingly, genetic monitoring of these genes would be also important.

In conclusion, this is the first large-scale whole genome-based study to assess the long-term evolution of common human RVA (G3P[8]) in an Asian country. The genetic information in this study is expected to contribute as a baseline data to understand long-term evolution of rotavirus genome, and to formulate policies for the use of rotavirus vaccines.

## Supporting Information

**Figure S1** Electropherotypes of representative rotavirus strains analyzed in this study having distinct migration patterns of NSP1 gene (RNA segment 5).

(PPT)

**Figure S2** Alignment of partial nucleotide sequences of VP2 gene of the G3 rotavirus strains.

(DOC)

**Figure S3** Alignment of partial VP2 amino acid sequences of the G3 rotavirus strains.

(DOC)

**Figure S4** Alignment of the amino acid residues defining the neutralization domains (designated as 7-1a, 7-1b and 7-2) of VP7 between the G3 strain in RotaTeq and Chinese G3P[8] RVA strains detected in Wuhan from 2000 to 2013. Red indicates the residues different from those of RotaTeq.

(DOC)

**Figure S5** Alignment of the amino acid residues corresponding to those defining the VP4 neutralization domains (designated as 8-1, 8-2, 8-3 and 8-4) in the VP8\* subunit between the P[8] strains in

Rotarix and RotaTeq and Chinese G3P[8] RVA strains detected in Wuhan from 2000 to 2013.

(DOC)

**Figure S6** Alignment of the amino acid residues corresponding to those defining the VP4 neutralization domains designated as 5-1, 5-2, 5-3, 5-4 and 5-5 in the VP5\* subunit between the P[8] strains in Rotarix and RotaTeq and Chinese G3P[8] RVA strains detected in Wuhan from 2000 to 2013.

(DOC)

**Table S1** Identity of VP7 gene and deduced amino acid sequences of representative G3 strains detected worldwide to the new variant G3 strain “5091”.

(XLS)

## References

- Tate JE, Burton AH, Boschi-Pinto C, Steele AD, Duque J, et al WHO-coordinated Global Rotavirus Surveillance Network. (2012) 2008 estimate of worldwide rotavirus-associated mortality in children younger than 5 years before the introduction of universal rotavirus vaccination programmes: a systematic review and meta-analysis. *Lancet Infect Dis* 12:136–141.
- Estes M, Kapikian A (2007) Rotaviruses. In *Fields Virology*, edn. 5, Edited by Knipe DM, Howley PM, Griffin DE, Lamb RA, Martin MA, Roizman B, Straus SE. KluwerHealth/Lippincott, Williams and Wilkins, pp 1917–1974.
- Matthijssens J, Ciarlet M, McDonald SM, Attoui H, Banyai K, et al. (2011) Uniformity of rotavirus strain nomenclature proposed by the Rotavirus Classification Working Group (RCWG). *Arch Virol* 156:1397–1413.
- Trojnar E, Sachsenroder J, Twardziok S, Rectz J, Otto PH, et al. (2013) Identification of an avian group A rotavirus containing a novel VP4 gene with a close relationship to those of mammalian rotaviruses. *J Gen Virol* 94:136–142.
- Santos N, Hoshino Y (2005) Global distribution of rotavirus serotypes/genotypes and its implication for the development and implementation of an effective rotavirus vaccine. *Rev Med Virol* 15:29–56.
- Gentsch JR, Woods PA, Ramachandran M, Das BK, Leite JP, et al. (1996) Review of G and P typing results from a global collection of rotavirus strains: implications for vaccine development. *J Infect Dis* 174 Suppl 1:S30–36.
- Kawai K, O'Brien MA, Goveia MG, Mast TC, El Khoury AC (2012) Burden of rotavirus gastroenteritis and distribution of rotavirus strains in Asia: a systematic review. *Vaccine*. 30:1244–1254.
- Fang ZY, Yang H, Qi J, Zhang J, Sun LW, et al. (2002) Diversity of rotavirus strains among children with acute diarrhea in China: 1998–2000 surveillance study. *J Clin Microbiol* 40:1875–1878.
- Orenstein EW, Fang ZY, Xu J, Liu C, Shen K, et al. (2007) The epidemiology and burden of rotavirus in China: a review of the literature from 1983 to 2005. *Vaccine*. 25:406–413.
- Duan ZJ, Liu N, Yang SH, Zhang J, Sun LW, et al. (2009) Hospital-based surveillance of rotavirus diarrhea in the People's Republic of China, August 2003–July 2007. *J Infect Dis* 200 Suppl 1:S167–173.
- Fang ZY, Wang B, Kilgore PE, Bresee JS, Zhang LJ, et al. (2005) Sentinel hospital surveillance for rotavirus diarrhea in the People's Republic of China, August 2001–July 2003. *J Infect Dis* 192 Suppl 1:S94–99.
- Zhang XE, Li DD, Li X, Yang XD, Cai K, et al. (2012) [Etiological and epidemiological study on viral diarrhea among children in Changchun]. *Zhonghua Shi Yan He Lin Chuang Bing Du Xue Za Zhi* 26:5–7. Chinese.
- Chen Y, Li Z, Han D, Cui D, Chen X, et al. (2013) Viral agents associated with acute diarrhea among outpatient children in southeastern China. *Pediatr Infect Dis J* 32:e285–e290.
- Phan TG, Trinh QD, Khamrin P, Kaneshi K, Ueda Y, et al. (2007) Emergence of new variant rotavirus G3 among infants and children with acute gastroenteritis in Japan during 2003–2004. *Clin Lab* 53:41–48.
- Thongprachum A, Chan-itt W, Khamrin P, Okitsu S, Nishimura S, et al. (2013) Reemergence of new variant G3 rotavirus in Japanese pediatric patients, 2009–2011. *Infect Genet Evol* 13:168–174.
- Wang YH, Kobayashi N, Zhou DJ, Yang ZQ, Zhou X, et al. (2007) Molecular epidemiologic analysis of group A rotaviruses in adults and children with diarrhea in Wuhan city, China, 2000–2006. *Arch Virol* 152:669–685.
- Wang YH, Kobayashi N, Zhou X, Nagashima S, Zhu ZR, et al. (2009) Phylogenetic analysis of rotaviruses with predominant G3 and emerging G9 genotypes from adults and children in Wuhan, China. *J Med Virol* 81:382–389.
- Wang YH, Zhou X, Ghosh S, Zhou DJ, Pang BB, et al. (2011) Prevalence of human rotavirus genotypes in Wuhan, China, during 2008–2011: changing trend of predominant genotypes and emergence of strains with the P[8] subtype of the VP4 gene. *Arch Virol* 156:2221–2231.
- McDonald SM, Matthijssens J, McAllen JK, Hine E, Overton L, et al. (2009) Evolutionary dynamics of human rotaviruses: balancing reassortment with preferred genome constellations. *PLoS Pathog*. 5:e1000634.
- Heiman EM, McDonald SM, Barro M, Taraporewala ZF, Bar-Magen T, et al. (2008) Group A human rotavirus genomics: evidence that gene constellations are influenced by viral protein interactions. *J Virol* 82:11106–11116.
- Wen L, Nakayama M, Yamanishi Y, Nishio O, Fang Z.-Y, et al. (1997) Genetic variation in the VP7 gene of human rotavirus serotype 3 (G3 type) isolated in China and Japan. *Arch Virol* 142:1481–1489.
- Nakagomi T, Gentsch JR, Das BK, Kumar R, Bhan MK, et al. (2002) Molecular characterization of serotype G2 and G3 human rotavirus strains that have an apparently identical electropherotype of the short RNA pattern. *Arch Virol* 147:2187–2195.
- Varshney B, Jagannath MR, Vethanayagam RR, Kodhandaraman S, Jagannath HV, et al. (2002) Prevalence of, and antigenic variation in, serotype G10 rotaviruses and detection of serotype G3 strains in diarrheic calves: implications for the origin of G10P11 or P11 type reassortant asymptomatic strains in newborn children in India. *Arch Virol* 147:143–165.
- Khamrin P, Peerakome S, Wongsawadi L, Tonusin S, Sornchai P, et al. (2006) Emergence of human G9 rotavirus with an exceptionally high frequency in children admitted to hospital with diarrhea in Chiang Mai, Thailand. *J Med Virol* 78:273–280.
- Min BS, Noh YJ, Shin JH, Baek SY, Kim JO, et al. (2004) Surveillance study (2000 to 2001) of G- and P-type human rotaviruses circulating in South Korea. *J Clin Microbiol* 42:4297–4299.
- Trinh QD, Pham NT, Nguyen TA, Phan TG, Khamrin P, et al. (2007) Amino acid substitutions in the VP7 protein of human rotavirus G3 isolated in China, Russia, Thailand, and Vietnam during 2001–2004. *J Med Virol* 79:1611–1616.
- Lai HC, Lin SJ, Lin HR, Ku CS, Wang L, et al. (2005) Phylogenetic analyses of human rotavirus in central Taiwan in 1996, 2001 and 2002. *J Clin Virol* 32:199–217.
- Lennon G, Reidy N, Cryan B, Fanning S, O'Shea H (2008) Changing profile of rotavirus in Ireland: predominance of P[8] and emergence of P[6] and P[9] in mixed infections. *J Med Virol* 80:524–530.
- Mitui MT, Chan PK, Nelson EA, Leung TF, Nishizono A, et al. (2011) Co-dominance of G1 and emerging G3 rotaviruses in Hong Kong: A three-year surveillance in three major hospitals. *J Clin Virol* 50:325–333.
- Seheri LM, Page N, Dewar JB, Geyer A, Nemarude AL, et al. (2010) Characterization and molecular epidemiology of rotavirus strains recovered in Northern Pretoria, South Africa during 2003–2006. *J Infect Dis* 202:S139–S147.
- Martinez-Laso J, Román A, Rodriguez M, Cervera I, Head J, et al. (2009) Diversity of the G3 genes of human rotaviruses in isolates from Spain from 2004 to 2006: cross-species transmission and inter-genotype recombination generates alleles. *J Gen Virol* 90:935–943.
- Ward P, Poitras E, Leblanc D, Gagnon CA, Brassard J, et al. (2013) Comparison of different RT-qPCR assays for the detection of human and bovine group A rotaviruses and characterization by sequences analysis of genes encoding VP4 and VP7 capsid proteins. *J Appl Microbiol* 114:1435–1448.
- Sanchez-Fauquier A, Montero V, Moreno S, Sole M, Colomina J, et al. (2006) Human rotavirus G9 and G3 as major cause of diarrhea in hospitalized children, Spain. *Emerg Infect Dis* 12:1536–1541.
- Ngo TC, Nguyen BM, Dang DA, Nguyen HT, Nguyen TT, et al. (2009) Molecular epidemiology of rotavirus diarrhoea among children in Haiphong, Vietnam: the emergence of G3 rotavirus. *Vaccine* 27 Suppl 5:F75–80.
- Tamura T, Nishikawa M, Anh DD, Suzuki H (2010) Molecular epidemiological study of rotavirus and norovirus infections among children with acute

**Table S2** Primers used for amplification of different genes of G3P[8] RVA strains.

(DOC)

**Table S3** Amino acid differences among the Chinese G3P[8] RVA strains belonging to different phylogenetic lineages.

(DOC)

## Acknowledgments

We are extremely grateful to the doctors who collaborated to our study and collected stool specimens from diarrheal patients in their hospitals.

## Author Contributions

Conceived and designed the experiments: YHW NK. Performed the experiments: YHW XZ BBP SG TS YWS MYH MQL WFT. Analyzed the data: YHW SG BBP XZ YWS MYH NU NK QH. Contributed reagents/materials/analysis tools: YHW JSP DJZ NK SG NU. Wrote the paper: YHW SG NK.

- gastroenteritis in Nha Trang, Vietnam, December 2005–June 2006. *Jpn J Infect Dis* 63:405–411.
36. Ahmed K, Batuwanthudawe R, Chandrasena TG, Mitui MT, Rajindrajith S, et al. (2010) Rotavirus infections with multiple emerging genotypes in Sri Lanka. *Arch Virol* 155:71–75.
  37. McDonald SM, McKell AO, Rippering CM, McAllen JK, Akopov A, et al. (2012) Diversity and relationships of cocirculating modern human rotaviruses revealed using large-scale comparative genomics. *J Virol* 86:9148–9162.
  38. Wang Z, Han Y, An S, Guo J (2009) Detection of Human Rotavirus and Human Astrovirus from Children with Diarrhea in Liaoning Province. *Zhongguo Wei Sheng Jian Yan* 19:643–645. Chinese.
  39. Chan-It W, Thongprachum A, Dey SK, Phan TG, Khamrin P, et al. (2011) Detection and genetic characterization of rotavirus infections in non-hospitalized children with acute gastroenteritis in Japan, 2007–2009. *Infect Genet Evol* 11:415–422.
  40. Chaimongkol N, Khamrin P, Malasao R, Thongprachum A, Ushijima H, et al. (2012) Genotypic linkages of gene segments of rotaviruses circulating in pediatric patients with acute gastroenteritis in Thailand. *Infect Genet Evol* 12:1381–1391.
  41. Stupka JA, Carvalho P, Amarilla AA, Massana M, Parra GI, et al. (2009) National rotavirus surveillance in Argentina: high incidence of G9P[8] strains and detection of G4P[6] strains with porcine characteristics. *Infect Genet Evol* 9:1225–1231.
  42. Meiji-Soc-Aung, Tin-Sabai-Aung, Khin-Yi-Oo, Ne-Win, Ghosh S, et al. (2010) Phylogenetic analysis of human rotavirus in Myanmar: detection of Indian-Bangladeshi G1/G2 lineages, Chinese G3 lineage and OP354-like P[8] lineage (P[8]b subtype). *Southeast Asian J Trop Med Public Health* 41:1393–1404.
  43. Pietsch C, Schuster V, Liebert UG (2011) A hospital based study on inter- and intragenotypic diversity of human rotavirus A VP4 and VP7 gene segments, Germany. *J Clin Virol* 50:136–141.
  44. Han TH, Kim CH, Chung JY, Park SH, Hwang ES (2010) Genetic characterization of rotavirus in children in South Korea from 2007 to 2009. *Arch Virol* 155:1663–1673.
  45. Zeller M, Patton JT, Heylen E, De Coster S, Ciarlet M, et al. (2012) Genetic analyses reveal differences in the VP7 and VP4 antigenic epitopes between human rotaviruses circulating in Belgium and rotaviruses in Rotarix and RotaTeq. *J Clin Microbiol* 50:966–976.
  46. Bucardo F, Rippering CM, Svensson L, Patton JT (2012) Vaccine-derived NSP2 segment in rotaviruses from vaccinated children with gastroenteritis in Nicaragua. *Infect Genet Evol* 12:1282–1294.
  47. Ghosh S, Kobayashi N (2011) Whole-genomic analysis of rotavirus strains: current status and future prospects. *Future Microbiol* 6:1049–1065.
  48. Shintani T, Ghosh S, Wang YH, Zhou X, Zhou DJ, et al. (2012) Whole genomic analysis of human G1P[8] rotavirus strains from different age groups in China. *Viruses* 4:1289–1304.
  49. Chen Y, Wen Y, Liu X, Xiong X, Cao Z, et al. (2008) Full genomic analysis of human rotavirus strain TB-Chen isolated in China. *Virology* 375:361–373.
  50. Wang YH, Pang BB, Zhou X, Ghosh S, Tang WF, et al. (2013) Complex evolutionary patterns of two rare human G3P[9] rotavirus strains possessing a feline/canine-like H6 genotype on an AU-1-like genotype constellation. *Infect Genet Evol* 16:103–112.
  51. Wang YH, Kobayashi N, Nagashima S, Zhou X, Ghosh S, et al. (2010) Full genomic analysis of a porcine-bovine reassortant G4P[6] rotavirus strain R479 isolated from an infant in China. *J Med Virol* 82:1094–1102.
  52. Dong HJ, Qian Y, Huang T, Zhu RN, Zhao LQ, et al. (2013) Identification of circulating porcine-human reassortant G4P[6] rotavirus from children with acute diarrhea in China by whole genome analyses. *Infect Genet Evol* 20C:115–162.
  53. Kobayashi N, Lintag IC, Urasawa T, Taniguchi K, Saniel MC, et al. (1989) Unusual human rotavirus strains having subgroup I specificity and “long” RNA electropherotype. *Arch Virol* 109:11–23.
  54. Gouvea V, Glass RI, Woods P, Taniguchi K, Clark HF, et al. (1990) Polymerase chain reaction amplification and typing of rotavirus nucleic acid from stool specimens. *J Clin Microbiol* 28:276–282.
  55. Gentsch JR, Glass RI, Woods P, Gouvea V, Gorziglia M, et al. (1992) Identification of group A rotavirus gene 4 types by polymerase chain reaction. *J Clin Microbiol* 30:1365–1373.
  56. Iturriza-Gómara M, Kang G, Gray J (2004) Rotavirus genotyping: keeping up with an evolving population of human rotaviruses. *J Clin Virol* 31:259–265.
  57. Nagashima S, Kobayashi N, Paul SK, Ghosh S, Chawla-Sarkar M, et al. (2010) Identification of P[8]b subtype in OP354-like human rotavirus strains by a modified RT-PCR method. *Jpn J Infect Dis* 63:208–211.
  58. Aoki ST, Settembre EC, Trask SD, Greenberg HB, Harrison SC, et al. (2009) Structure of rotavirus outer-layer protein VP7 bound with a neutralizing Fab. *Science*. 324:1444–1447.
  59. Dormitzer PR, Nason EB, Prasad BV, Harrison SC (2004) Structural rearrangements in the membrane penetration protein of a non-enveloped virus. *Nature*. 430:1053–1058.
  60. Parashar UD, Burton A, Lanata C, Boschi-Pinto C, Shibuya K, et al. (2009) Global mortality associated with rotavirus disease among children in 2004. *J Infect Dis* 200 Suppl 1:S9–S15.
  61. Li RC, Huang T, Li Y, Luo D, Tao J, et al. (2014) Human rotavirus vaccine (RIX4414) efficacy in the first two years of life: A randomized, placebo-controlled trial in China. *Hum Vaccin Immunother* 10:1–8; 2014.
  62. Soares-Weiser K, Maclellan H, Bergman H, Ben-Aharon I, Nagpal S, et al. (2012) Vaccines for preventing rotavirus diarrhoea: vaccines in use. *Cochrane Database Syst Rev* doi: 10.1002/14651858.
  63. Hua J, Mansell EA, Patton JT (1993) Comparative analysis of the rotavirus NS53 gene: conservation of basic and cysteine-rich regions in the protein and possible stem-loop structures in the RNA. *Virology* 196:372–378.
  64. Barro M, Patton JT (2005) Rotavirus nonstructural protein 1 subverts innate immune response by inducing degradation of IFN regulatory factor 3. *Proc Natl Acad Sci U S A* 102:4114–4119.
  65. Bagchi P, Dutta D, Chattopadhyay S, Mukherjee A, Halder UC, et al. (2010) Rotavirus nonstructural protein 1 suppresses virus-induced cellular apoptosis to facilitate viral growth by activating the cell survival pathways during early stages of infection. *J Virol* 84:6834–6845.
  66. Graff JW, Ettayebi K, Hardy ME (2009) Rotavirus NSP1 inhibits NFκB activation by inducing proteasome-dependent degradation of beta-TrCP: a novel mechanism of IFN antagonism. *PLoS Pathog* 5:e1000280.
  67. Barro M, Patton JT (2007) Rotavirus NSP1 inhibits expression of type I interferon by antagonizing the function of interferon regulatory factors IRF3, IRF5, and IRF7. *J Virol* 81:4473–4481.
  68. Feng N, Sen A, Nguyen H, Vo P, Hoshino Y, et al. (2009) Variation in antagonism of the interferon response to rotavirus NSP1 results in differential infectivity in mouse embryonic fibroblasts. *J Virol* 83:6987–6994.
  69. Arnold MM, Patton JT (2011) Diversity of interferon antagonist activities mediated by NSP1 proteins of different rotavirus strains. *J Virol* 85:1970–1979.
  70. Matthijssens J, Nakagomi O, Kirkwood CD, Ciarlet M, Desselberger U, et al. (2012) Group A rotavirus universal mass vaccination: how and to what extent will selective pressure influence prevalence of rotavirus genotypes? *Expert Rev Vaccines*. 11:1347–1354.
